1 **DNA barcoding reveals ongoing immunoediting of clonal cancer populations**  
2 **during metastatic progression and in response to immunotherapy**

3

4 Louise A. Baldwin<sup>1,2</sup>, Nenad Bartonicek<sup>1,2</sup>, Jessica Yang<sup>1</sup>, Sunny Z. Wu<sup>1,2</sup>, Niantao  
5 Deng<sup>1,2</sup>, Daniel L. Roden<sup>1,2</sup>, Chia-Ling Chan<sup>1</sup>, Ghamdan Al-Eryani<sup>1,2</sup>, Alexander  
6 Swarbrick<sup>1,2</sup>, and Simon Junankar<sup>1,2\*</sup>.

7

8 **Affiliations**

9 *(1) The Kinghorn Cancer Centre and Cancer Research Theme, Garvan Institute of*  
10 *Medical Research, Darlinghurst, NSW 2010, Australia*

11 *(2) St Vincent's Clinical School, Faculty of Medicine, UNSW Sydney, NSW 2052,*  
12 *Australia*

13 \*Corresponding author: [s.junankar@garvan.org.au](mailto:s.junankar@garvan.org.au)

14

15 Key words: Immunoediting, immunotherapy resistance, breast cancer

16

17 **Abstract**

18 Cancers evade the immune system in order to grow or metastasise through the  
19 process of cancer immunoediting. While checkpoint inhibitor therapy has been  
20 effective for reactivating tumour immunity in some cancers, many solid cancers,  
21 including breast cancer, remain largely non-responsive. Understanding the way  
22 non-responsive cancers evolve to evade immunity, what resistance pathways are  
23 activated and whether this occurs at the clonal level will improve  
24 immunotherapeutic design. We tracked cancer cell clones during the  
25 immunoediting process and determined clonal transcriptional profiles that allow  
26 immune evasion in murine mammary tumour growth in response to  
27 immunotherapy with anti-PD1 and anti-CTLA4. Clonal diversity was significantly  
28 restricted by immunotherapy treatment at both the primary and metastatic sites.  
29 These findings demonstrate that immunoediting selects for pre-existing breast  
30 cancer cell populations, that immunoediting is not a static process and is ongoing  
31 during metastasis and immunotherapy treatment. Isolation of immunotherapy  
32 resistant clones revealed unique and overlapping transcriptional signatures. The  
33 overlapping gene signature was predictive of poor survival in basal-like breast  
34 cancer patient cohorts. Some of these overlapping genes have existing small  
35 molecules which can be used to potentially improve immunotherapy response.

36 **Introduction**

37 All cancers must find ways to evade the immune system so that they can continue  
38 to grow (1). Previous studies have established that this occurs through a process  
39 called immunoediting (2). During immunoediting, the more immunogenic cancer  
40 cells are selectively eliminated by the immune system thus leaving behind less  
41 immunogenic cancer cells that are then free to expand. Immunoediting can occur  
42 through multiple mechanisms, these include the elimination of cells with strong  
43 immunogenic mutations, leading to the loss of neo-antigens (3) or the selection of  
44 cells with elevated expression of various immunosuppressive programs (4).

45 Immunotherapies look to overcome some of the immune evasion pathways  
46 established by the cancer cells to avoid recognition and elimination by the  
47 immune system during immunoediting. The prominent clinically approved  
48 immunotherapies for solid tumours target T cell checkpoint molecules (eg. anti-

49 CTLA-4 and anti-PD1) to overcome T cell exhaustion (5, 6). In select cancer types  
50 such as melanoma, these drugs have dramatic effects in a large proportion of  
51 patients (7). Unfortunately for metastatic breast cancer early clinical trials have  
52 seen few patients experiencing durable responses even in the most sensitive  
53 basal-like subtype of breast cancer (8). This indicates that in metastatic breast  
54 cancer, resistance can rapidly develop to anti-PD1/PDL1 therapy and suggests  
55 that alternate immune drug targets are needed for breast cancer.

56 While the immune system is known to play a role in breast cancer outcome (9)  
57 and recent evidence has indicated that immunoediting can occur in a transgenic  
58 mouse model of breast cancer (10), very little is known about the specifics of  
59 immune evasion by breast cancer cells. The majority of studies examining this  
60 phenomenon were performed in the highly mutated MCA carcinogen driven  
61 sarcoma model, and could not track the response at a clonal level (11). Of interest,  
62 a recent study suggested that immunoediting by T cells can occur at the clonal  
63 level, by demonstrating the selection of clones that contain less-immunogenic  
64 fluorophores (12). This leaves an important gap in our collective knowledge as to  
65 the mechanisms employed in less immunogenic tumours such as breast.

66 NK cells and T cells have both been demonstrated to play a role in immunoediting  
67 (13, 14). However, the majority of recent research has focussed on pathways  
68 relevant to T cell recognition (15-19). Downregulation of MHC is one mechanism  
69 by which cancer clones become impervious to T cells (20), but this inherently  
70 makes them targets of NK activity. In breast cancer NK dysfunction is noted and  
71 this is regulated by microenvironmental factors (21). Data on resistance pathways  
72 that allow for immune evasion from both T cells and NK cells are currently more  
73 limited.

74 To understand the process of immunoediting in breast cancer we conducted DNA  
75 barcoding (22, 23) of murine EMT6 and 4T1 mammary carcinoma cells, which  
76 were introduced into both immune competent and immunocompromised mice  
77 (Fig 1). DNA barcoding allows tracking of individual clones and clonal expansion  
78 while avoiding introduction of potentially immunogenic proteins (24). This  
79 system allowed us to analyse immunoediting *in vivo* at primary and metastatic  
80 sites and to study whether resistance to checkpoint immunotherapy developed  
81 from pre-existing or *de novo* generated cell populations. We show that  
82 immunoediting is initiated by the endogenous immune system in primary  
83 tumours and that cancer cells undergo a second round of immunoediting during  
84 metastasis. We further observed that immunoediting of specific clones is  
85 enhanced at both sites by checkpoint immunotherapy. We also identified cancer  
86 cell clones highly resistant to immunotherapy. RNA-sequencing (RNA-Seq)  
87 analysis of these resistant clones demonstrated that each clone had activated  
88 unique immune evasion pathways, with one downregulating MHC-I expression  
89 and another upregulating PD-L1. However, these clones also contained a common  
90 gene expression signature that is highly predictive of poor survival in both the  
91 METABRIC and TCGA basal-like breast cancer cohorts. This study has thus  
92 determined the patterns of immunoediting at a clonal level, that metastatic cells  
93 undergo a second round of immunoediting, and that immunotherapy significantly  
94 restricts clonal diversity. We go on to determine unique pathways activated in  
95 immune evasive cancer cells that are targetable and could improve  
96 immunotherapy response in breast cancer patients.

97 **Results:**

98 **Immunoediting of breast cancer cells in the primary tumour**

99 To understand the role of the immune system and immunotherapy in shaping the  
100 clonal dynamics of cancer cells within primary tumours we used the  
101 immunotherapy-sensitive syngeneic mammary carcinoma model EMT6 (25). The  
102 ClonTracer DNA barcode library (22) was introduced into the EMT6 cells resulting  
103 in ~41 000 unique barcodes identified by DNA sequencing. Following inoculation  
104 of 250 000 cells (~6 fold over representation of each barcode) into the mammary  
105 fat pad we compared the number of clones able to engraft and grow in immune-  
106 competent, syngeneic wild-type (WT) Balb/c mice or severely  
107 immunocompromised NOD SCID Gamma (NSG) mice (Fig 2A).

108 Tumour growth was much more rapid in the NSG mice with tumours reaching  
109 ethical endpoint on day 14 post-transplant, whereas wild-type mice all reached  
110 ethical endpoint by day 23 (Fig 2B). This led to NSG mice having significantly  
111 shorter overall survival (median survival 14 days) when compared to wild-type  
112 mice (median survival 22 days, Mantel-Cox  $p=0.009$ ), demonstrating that the  
113 immune system plays an important role in controlling primary tumour growth in  
114 the EMT6 model (Fig 2C).

115 To examine the influence of immunotherapy on tumour growth & clonal dynamics,  
116 we compared wild-type mice treated with combination immunotherapy (anti-PD1  
117 + anti-CTLA4) or control antibodies starting from day 10 when tumours were  
118 approximately 200mm<sup>3</sup> (Fig 2A). All control mice reached ethical endpoint by day  
119 23 (Fig 2D). In contrast, all treated tumours regressed following treatment, with  
120 50% relapsing and reaching ethical endpoint between days 46 and 54 (Fig 2D).  
121 The remaining immunotherapy treated mice remained tumour free when the  
122 experiment was terminated on day 60. Kaplan-Meier analysis demonstrated that  
123 immunotherapy significantly increased survival with median survival increasing  
124 from 22 days to 57 days (Mantel-Cox  $p=0.0006$ ) (Fig 2E).

125 To determine if immune control of tumour growth was driven at a clonal level, we  
126 examined the number and distribution of barcodes present in primary tumours.  
127 We found that at ethical endpoint the tumours grown in NSG mice had over 50  
128 times the number of unique barcodes as tumours grown in control WT mice  
129 ( $p=0.0002$ , unpaired t-test), which in turn had more than 20 times the number of  
130 unique barcodes found in immunotherapy treated WT mice ( $p=0.0019$ , unpaired  
131 t-test) (Fig 2F). We applied Shannon diversity analysis to these samples to  
132 understand how the immune system influenced the diversity of barcodes.  
133 Shannon diversity index is determined by how evenly distributed the barcodes are  
134 within a population and is only moderately influenced by barcode number.  
135 Analysis of barcode diversity revealed a trend to a reduction in barcode diversity  
136 in the tumours from the control Balb/c mice compared to the NSG mice, whereas  
137 there was a dramatic reduction in barcode diversity following immunotherapy  
138 treatment ( $p<0.001$  unpaired t-test) when compared to the control treated mice  
139 (Fig 2G). This data indicates that a subset of EMT6 cells are more resistant to the  
140 endogenous immune system but that this selection does not skew the evenness of  
141 the barcode distribution dramatically. This suggests that the clones that are  
142 resistant to the immune system all have a similar level of resistance. In contrast  
143 immunotherapy applies a much more stringent bottleneck that only a limited

144 number of clones can readily overcome and with a high variability in the levels of  
145 resistance. Further analysis identified specific EMT6 clones that were  
146 reproducibly enriched across multiple replicate mice following immunotherapy  
147 treatment indicating that they had a pre-existing resistance phenotype that was  
148 being positively selected for (Fig 2H).

#### 149 **Immunoediting of breast cancer cells during metastasis**

150 To determine whether immunoediting continued during metastatic dissemination  
151 and whether specific metastatic clones were enriched or depleted, we turned to  
152 the highly metastatic 4T1 mammary carcinoma model, as the EMT6 cell line is  
153 poorly metastatic (26). The barcode library was introduced into the 4T1 cells  
154 leading to a cell line with ~5000 unique barcodes. To see how the immune system  
155 regulated clonal cancer growth during the metastatic cascade, 50,000 cells (a ~  
156 10-fold over- representation of each barcode) were inoculated into the mammary  
157 fat pad of WT and NSG mice. Primary tumours were resected 15 days following  
158 inoculation to allow metastases to develop (Fig 3A). Following primary tumour  
159 resection all mice developed lethal lung metastases. NSG mice succumbed to  
160 metastatic disease earlier than WT mice with a median survival of 25.5 days verses  
161 35 days ( $p = 0.0002$ , Mantel-Cox Log-rank test) (Fig 3B). Primary tumour size at  
162 resection was equivalent between the groups (Sup Fig 1A). Adjuvant  
163 immunotherapy with combination anti-PD1 + anti-CTLA4 led to a modest but  
164 significant increase in survival (37.5 days) versus control treated mice (33 days;  
165  $p=0.0121$ , Mantel-Cox Log-rank test) (Fig 3C).

166 We then examined whether the endogenous immune system shaped metastatic  
167 clonal dynamics. While primary tumours contained similar numbers of clones and  
168 barcode diversity in NSG and WT hosts (Fig. 3D and Sup Fig 1B, C), metastatic  
169 lungs of NSG mice contained ~3 times as many barcode clones as WT controls (Fig  
170 3D). We next sought to determine if the increase in survival following  
171 immunotherapy (Fig. 3C) was associated with alterations in clonal dynamics. As  
172 the treatment was only given after excision of the primary tumour, the  
173 immunotherapy would only affect the outgrowth of cancer cells that had already  
174 metastasised to the lung. Despite only observing a modest increase in survival  
175 following combination immunotherapy (Fig 3C), we observed a 70% reduction in  
176 the number of clones able to form metastases (Fig 3E).

177 The increase in barcode number in the lungs of NSG mice was associated with a  
178 significant increase in diversity as measured using the Shannon diversity index  
179 (Fig 3F). This shows that the endogenous immune system restricts the number  
180 and skews the diversity of metastatic clones that can reach and outgrow in the  
181 lungs. In addition to the reduction in barcode number following immunotherapy  
182 treatment, we also saw a significant reduction in barcode diversity as measured  
183 using the Shannon diversity index (Fig 3F). This indicates that immunotherapy is  
184 leading to the immunoediting of specific clonal cell populations over others.

185 To further understand the key immune cell types that control clonal outgrowth in  
186 the metastatic lungs we depleted either CD8 T cells (anti-CD8) or NK cells (anti-  
187 asialo-GM1) in wildtype mice starting one day prior to tumour resection. Neither  
188 treatment led to a significant change in overall survival (Sup Fig 2A). However,  
189 depletion of either cell type led to an increase in the number of clones detected  
190 within the lungs, reaching statistical significance with T-cell depletion (Fig 3G).



191 This indicates that CD8 T cells and perhaps NK cells play a role in eliminating  
192 metastatic clones within the lungs.

193 These results were reproducible, as demonstrated by a second pool of barcoded  
194 4T1 cells containing a larger barcode library (300 000 barcodes). Following the  
195 injection of 50 000 barcoded cells we recovered approximately 10 000 - 12 000  
196 barcode sequences from each primary tumour and this was relatively unchanged  
197 in the NSG mice (Sup Fig 3A). This suggests that roughly a fifth of the injected cells  
198 are able to engraft and grow in the mammary gland. As clone diversity was  
199 unchanged in NSG mice this confirms that the immune system does not play a  
200 major role in restricting growth of 4T1 carcinoma cells in the primary tumour  
201 setting. In contrast when we examined the number of clones that had spread to  
202 the lungs of NSG mice we again found approximately 3 times as many when  
203 compared to the wild-type mice (Sup Fig 3A). In addition, we similarly saw a ~3-  
204 fold reduction in barcode diversity in response to immunotherapy (Sup Fig 3B).  
205 Due to the high complexity of the 300 000 barcode library each mouse received  
206 only a partially overlapping complement of barcode clones.

### 207 **Patterns of enrichment and depletion of specific clones**

208 To better understand how specific clonal cell populations responded to the  
209 immune system and immunotherapy we combined the barcode frequencies from  
210 the two datasets utilising the 5000 barcode library (WT vs NSG and Control vs  
211 Immunotherapy). We performed unsupervised hierarchical clustering of these  
212 samples and selected barcodes that were observed at greater than 5% frequency  
213 in any one sample. We found that the primary tumours from the two experiments  
214 cluster together irrespective of the immune status of the mouse (Balb/c or NSG),  
215 further suggesting that 4T1 cells do not undergo immunoediting at the primary  
216 site (Fig 4A). In contrast, lung tumours formed in the NSG hosts did not cluster  
217 with lung tumours formed in Balb/c lungs, with the immunotherapy treated  
218 samples mostly clustering alone or with metastases formed in WT mice. A number  
219 of specific barcodes were enriched in the metastatic lungs of all the NSG mice  
220 indicating these clones were highly metastatic (Fig 4A). This agrees with the  
221 findings of Wagenblast and colleagues (23).

222 We identified a number of barcodes that had striking patterns of enrichment or  
223 depletion in response to the immune system and immunotherapy, we replotted  
224 these using a dot plot (Fig 4B). As these barcodes were enriched or depleted in a  
225 reproducible manner across replicate mice this suggests these are due to inherent  
226 features of these clones. Firstly, there are three barcodes that were enriched  
227 within the NSG lungs (NSG1-3), observed at lower abundance in the untreated  
228 wild-type mice, and that were completely eliminated following immunotherapy  
229 treatment. This suggest that while these clones are highly metastatic in the  
230 absence of an immune system, they are immunogenic and are thus subjected to  
231 immunoediting in WT mice particularly following immunotherapy. Another group  
232 of metastatic clones that were present in the lungs from NSG and WT mice were  
233 further enriched following immunotherapy (IE1-2). These immunotherapy  
234 enriched clones were detected in the lungs of all six replicate mice. With the  
235 dramatic reduction in the number of barcodes present following immunotherapy,  
236 the odds ratio of this happening by chance is 0.0034 (95% confidence interval:  
237 0.0010-0.0079; chi square p value:  $3.67 \times 10^{-251}$ ). This suggests that these clones

238 have a pre-existing resistance phenotype and are positively selected for following  
239 immunotherapy.

240 To further analyse how specific barcodes were enriched in lung metastases  
241 following immunotherapy we visualised the top nine clonal populations (based on  
242 average barcode proportions in the metastatic lungs) and generated fish-plots.  
243 These showed that different clones were preferentially enriched in the lungs of  
244 NSG mice when compared to WT mice (Fig 4C). Furthermore, we observed that a  
245 small subset of clones were highly enriched in the lungs of immunotherapy treated  
246 mice (Fig 4D).

#### 247 **Analysis of immunotherapy resistant clones**

248 To understand more about the phenotype of these immunotherapy resistant  
249 clones we established clonal cell populations from two of them (designated IE1  
250 and IE2), and two independent control clones (NT1 and NT2) that were not  
251 enriched following immunotherapy (3-4 independent clonal cell lines were  
252 generated per barcode). These clonal cell lines were isolated from the parental  
253 barcoded 4T1 cell population purely *in vitro* with no additional selective  
254 manipulation. The barcode within each of these clonal cell lines was confirmed to  
255 be correct using Sanger sequencing. All four clonal cell lines had similar growth  
256 kinetics *in vitro* indicating no proliferative advantage of the immune evasive  
257 clones *in vitro* (Sup Fig 4A).

#### 258 **Genomic analysis for barcode integration site and copy number variation** 259 **(CNV)**

260 To identify the barcode integration sites and determine whether the clones  
261 contained large scale genomic alterations we performed whole genome  
262 sequencing (WGS) at around 30x coverage of the clones. The WGS analysis  
263 determined the precise genomic location at which the barcodes integrated (Sup  
264 Table 1). IE1 integrated in the intergenic region between *Kpna2* and *Smurf2* and  
265 IE2 within an intron of *Nrf1*, neither integration site changed the coding sequence  
266 of these genes. Copy number analysis determined that no clone demonstrated  
267 dramatic copy number changes when compared to the other clones. Each clone  
268 only contained a small number of single copy number gains and losses (IE1 only 6  
269 CNVs and IE2 only 5 CNVs), with clone NT2 showing the greatest number of CNVs  
270 at 41 (summarised in Sup Table 2). We found one locus with a single copy number  
271 gain in both IE1 and IE2 that led to 3 copies of the genes *Nc3r1* (the Glucocorticoid  
272 receptor) and *Arhgap26* a Rho GTPase that associates with focal adhesion kinase  
273 (FAK), however, this gain was also present in the NT2 clone. These results  
274 demonstrate that large scale genomic changes likely do not play a large role in the  
275 various phenotypes of the different clones but suggest that copy number changes  
276 may be selected against during immunoediting.

#### 277 **Transcriptomic analysis of the clonal cell lines**

278 To investigate the mechanism of immune evasion by these clones we performed  
279 RNAseq analysis and compared the two immunotherapy resistant clones to the  
280 bulk 4T1 population. The IE1 clone had 1553 differentially expressed genes (Log  
281 fold change >2 and FDR  $p < 0.05$ ) with 478 significantly upregulated and 1075  
282 significantly downregulated (Fig 5A). The IE2 clone had 1099 differentially  
283 expressed genes with 375 significantly upregulated and 724 significantly

284 downregulated (Fig 5B). The non-target clones had fewer gene expression  
285 changes compared to the bulk 4T1 population with NT1 having 621 and NT2  
286 having only 262 differentially expressed genes. We examined the top differentially  
287 expressed genes between each of IE1 and IE2 with the parental 4T1 cells,  
288 however, we did not find any with an obvious role in immune evasion (Sup Tables  
289 3 & 4). Gene set enrichment analysis revealed that two of the top ten gene sets  
290 were upregulated in both IE1 and IE2 (CHEN\_HOXA5\_TARGETS\_9HR\_UP,  
291 BLUM\_RESPONSE\_TO\_SALIRASIB\_UP), while most were unique to either cell line  
292 (Sup Tables 5 & 6). *Hoxa5* is a known tumour suppressor gene in breast cancer  
293 (27) and although we see an enrichment of its target genes, the expression of  
294 *Hoxa5* itself was significantly reduced in the IE1 clone and there was a trend to  
295 reduced expression in the IE2 clone. There was no overlap in the top ten down  
296 regulated gene-sets between IE1 and IE2. The top downregulated gene-set for IE1  
297 was the REACTOME\_UB\_SPECIFIC\_PROCESSING\_PROTEASES gene-set, that  
298 contained two genes involved in antigen processing for display by MHC-I (*Psmb8*  
299 and *Psmb9*). As down regulation of the MHC-I pathway is a common mechanism  
300 of immune evasion we investigated this in more detail.

301 Through this analysis we found that the IE1 clone had significantly reduced  
302 expression of many genes related to antigen presentation including MHC-I (*H2-*  
303 *k1*), *Tap2*, *Psmb8*, *Psmb9* and *Psmb10* (Fig 5C). *H2-k1* is the main MHC molecule  
304 expressed by the Balb/c strain of mouse that the 4T1 carcinoma cell line was  
305 derived from. We validated the reduction in MHC-I expression levels seen in the  
306 RNAseq data at the protein level using flow cytometry (Fig 5D). This analysis  
307 showed that the IE1 clone had significantly reduced cell surface MHC-I protein  
308 expression compared to the bulk 4T1 population. We thus examined the WGS data  
309 and this showed that the loss of MHC-I expression in IE1 was not due to genomic  
310 loss at the MHC locus on chromosome 17 (Sup Fig 5A. In contrast the IE2 clone  
311 had elevated levels of a number of these MHC related genes (Fig 5C), in addition  
312 to a non-classical MHC molecule *H2-t23* (Fig 5E) that is known to negatively  
313 regulate NK cells through their inhibitory receptor *Nkg2a* (28). Interestingly IE2  
314 cells also demonstrated a significantly increased expression of the T cell inhibitory  
315 molecule *Cd274*/PD-L1 (Fig 5E). This again was validated at the protein level using  
316 flow cytometry (Fig 5F). These results demonstrate that each of the two  
317 immunotherapy resistant clones are phenotypically unique.

318 We next examined whether the copy number changes or barcode integration sites  
319 identified above impacted gene expression. In IE1 and IE2 the copy number  
320 changes in *Nc3r1* (the Glucocorticoid receptor) and *Arhgap26* were associated  
321 with significantly increased expression of these genes but NT2 demonstrated no  
322 change in expression (Sup Fig 5B). Elevated *Nc3r1* expression has been associated  
323 with poor prognosis and metastasis in TNBC although whether it plays a role in  
324 immune evasion is not known (29, 30). As stated above the barcode for IE1  
325 integrated in the intergenic region between *Kpna2* and *Smurf2* and IE2 within an  
326 intron of *Nrf1*. The expression of *Smurf2* was the only of these genes that was  
327 significantly altered with a modest log fold increase of 0.59 in IE1.

### 328 **Demethylating drugs do not fully restore MHC expression**

329 Demethylating agents such as 5-aza-2'-deoxycytidine (5-aza) are known to  
330 upregulate MHC-I expression in cancer cells (31), thus we treated our clonal cell

331 lines utilising 5-aza for 72 hours to determine whether DNA methylation was a  
332 mechanisms suppressing MHC expression in the IE1 clone. Using flow cytometry,  
333 we observed that MHC-I expression was elevated in a dose dependent manner  
334 following 5-aza treatment in all clones. However, MHC-I expression in the IE1  
335 clone was consistently lower than the parental 4T1 cell line at all doses of 5-aza  
336 (Sup Fig 6A). This indicates that gene hyper-methylation is not the mechanism of  
337 MHC-I suppression in the IE1 clone.

338 IFN-gamma stimulation is another mechanism by which MHC expression can be  
339 increased on cancer cells. The IE1 clone responded to IFN-gamma treatment by  
340 upregulating MHC-I expression but again it remained suppressed compared to the  
341 parental 4T1 cells (Sup Fig 6B). This suggests these cells broadly retain the  
342 transcriptional regulatory machinery that is required to upregulate MHC-I in  
343 response to IFN-gamma stimulation. These results indicate that MHC  
344 downregulation is likely regulated by epigenetic factors other than DNA  
345 methylation and that the majority of MHC expression in this clone can be restored  
346 by IFN-gamma treatment.

### 347 **Overlapping gene signature predicts poor survival in breast cancer patients**

348 We had noted that the GSEA analysis showed some overlap in enriched gene-sets  
349 between the two immune evasive clones (IE1 and IE2), we thus reasoned that as  
350 well as having unique immune evasion features these clones may have some  
351 pathways in common. To identify the common immune evasion pathways being  
352 initiated by both the immunotherapy resistant clones we generated Venn  
353 diagrams to identify overlapping gene expression changes (Sup Table 7). This  
354 analysis demonstrated that the immunotherapy resistant clones had more gene  
355 expression changes in common with each other and less in common with the  
356 control non-target clones (Fig 6A). We generated a heatmap of the top 50  
357 upregulated and downregulated genes across all the samples (Fig 6B) and  
358 performed GSEA analysis using C2 on the longer list (Sup Fig 7A, Sup Table 8).  
359 Only two gene sets had significant p values when you consider multiple testing,  
360 these were the HOXA5 gene set mentioned previously and a COVID19 related gene  
361 set. Although not significant there were several additional COVID19 related gene  
362 sets from the same recent publication identified in the overlapping upregulated  
363 gene list suggesting an immune related role of these genes (32).

364 Therefore we wanted to understand the role of these genes in patients, so we  
365 generated signatures from the top 25 upregulated and downregulated genes that  
366 had human orthologs and were detectable in both the METABRIC (33) and TCGA  
367 datasets (34). We then analysed the role of these signatures in survival using the  
368 basal-like breast cancer patients from these cohorts. While the patients in these  
369 cohorts have not been treated with immunotherapy it has previously been  
370 demonstrated that immune features such as the number of tumour infiltrating  
371 lymphocytes or regulatory T cells influence prognosis in basal-like breast cancer  
372 patients (35). When we analysed overall survival in these cohorts we observed  
373 that the upregulated signature associated with substantially poorer outcome in  
374 both cohorts (METABRIC:  $p=0.0043$ ,  $HR=2.0$ , Fig 6C; TCGA:  $p=0.042$ ,  $HR=4.3$ , Fig  
375 6D). In contrast the downregulated gene signature did not show any significance  
376 in either cohort (data not shown). We generated heatmaps with unsupervised  
377 clustering to determine whether specific genes or groups of genes from the



378 signature were specifically driving the association with survival (Sup Fig 7B). In  
379 the TCGA data we observed a number of clusters that seemed to associate more  
380 with survival, one of these included the genes *FAM71F2*, *MASP2*, *HLF*, *PPP1R15A*,  
381 *MMP23B* and *LIMS2*. Interestingly one of these genes *Ppp1r15a* also known as  
382 GADD34 has previously been demonstrated to be critical in blocking immunogenic  
383 cell death following chemotherapy, and when it was inhibited the chemotherapy  
384 response was improved in immunocompetent mice but not immunocompromised  
385 mice (36). A second group of genes included *SEZ6L2* and this gene has been  
386 associated with survival in a number of cancers but not through an immune  
387 related mechanism (37, 38). There was no enrichment of proliferation or invasion  
388 gene sets in our GSEA analysis suggesting that these processes were not behind  
389 the poor outcome of patients that highly express genes in the common  
390 upregulated signature.

391 Previous studies have shown that CTL infiltration correlates with survival in  
392 basal-like breast cancer so it is possible our signature is a surrogate measure of T  
393 cell infiltration. To test this, we performed TIDE analysis (39) on the TCGA and  
394 METABRIC cohorts followed by correlation analysis between the CTL signature  
395 score and our upregulated immune evasion signature score. This showed no  
396 correlation in the METABRIC cohort and only a weak negative correlation in the  
397 TCGA cohort (Sup Fig 7C) suggesting little overlap between these two predictors  
398 of patient survival. Future studies will be necessary to determine how the genes  
399 in this signature regulate survival, influence immune evasion and immunotherapy  
400 response.

401

## 402 **Discussion:**

403 Immunotherapy is revolutionising cancer therapy, with dramatic long-term  
404 responses seen in certain patient groups. Unfortunately, other patients see limited  
405 response to the current immunotherapies, and in particular some cancer types  
406 such as breast cancer are less responsive in general. Thus, our understanding of  
407 immune evasion in non-responsive cancer types needs significant improvement.  
408 We looked to address this by examining the fundamental pattern of immune  
409 evasion at a clonal level, and furthermore to use this information to identify  
410 pathways that could be targeted to overcome immunotherapy resistance. Using  
411 cellular DNA barcoding, we have demonstrated that the immune system shapes  
412 clonal evolution of primary and metastatic cancer cells in syngeneic models of  
413 basal-like breast cancer. Additionally, we have demonstrated that a second round  
414 of immunoediting occurs during metastasis and thus immune evasion at the  
415 primary site does not guarantee immune evasion during metastasis. DNA  
416 barcoding allows for tracking of specific clones with exquisite sensitivity. We find  
417 that immunotherapy enhances immunoediting at both the primary tumour and  
418 metastatic sites. Finally, we identify a common immune evasion gene signature in  
419 metastatic clones that is predictive of survival in basal-like breast cancer patients.

420 Here we show, for the first time in a solid tumour, that clonal immunoediting  
421 occurs in response to immunotherapy. Using the more immunotherapy sensitive  
422 EMT6 model we demonstrate that immunoediting occurs at the primary tumour  
423 site and that immunotherapy leads to strong clonal selection. The more  
424 immunotherapy resistant 4T1 model demonstrated that while most 4T1 cells are  
425 able to evade the immune system at the primary site, only a subset of these cells

426 are able to evade the immune system during metastasis. This indicates immune  
427 evasion is not a static process but requires ongoing regulation through tumour  
428 progression, even in a highly aggressive allograft model. These findings agree  
429 broadly agree with recent comprehensive genomic analysis of patient samples  
430 assessed across metastatic sites and over time (3, 40). These studies tracked clonal  
431 populations in metastatic lesions using whole genome sequencing, examined a  
432 number of immune correlates and could identify immunoediting that was  
433 associated with the immune response. However, they were unable to examine  
434 clonal heterogeneity driven by epigenetic or transcriptomic changes and were  
435 limited in identification of rare clones by sequencing depth. Future clinical studies  
436 utilising single cell approaches to analyse multiple biopsies from individual  
437 patients over a time-course of treatment will be necessary to confirm the key  
438 findings of this study in patients. While extremely challenging these studies are  
439 becoming more feasible with recent technological improvements.

440 Our study and that of others have indicated that immunoediting can be mediated  
441 by both CD8 T cells and NK cells (13, 14). In addition, immunoediting can select for  
442 clones with more immune evasive phenotypes irrespective of specific neoantigens  
443 (2, 4, 6). The only previous study examining immunoediting at a clonal level, used  
444 a fluorescent barcoding approach in a B cell leukemia model (12). While our  
445 findings broadly agree with the findings of this study, the study by Milo and  
446 colleagues was limited to five unique fluorescent clones that could be tracked, and  
447 were confounded by the variable immunogenicity of each of the different  
448 fluorescent proteins. Our DNA barcoding approach in contrast allowed for the  
449 labelling of thousands of clones and a much more precise identification of immune  
450 evasive clones. We could then isolate these specific clones and identify both  
451 common and variable features of immune evasion in individual clones.  
452 Furthermore, this technique unlike a fluorescent barcode approach allowed us to  
453 determine that pre-existing clones existed in both the EMT6 and 4T1 models that  
454 had greater immunotherapy resistance, as these exact clones were enriched from  
455 the same starting pool of cells across replicate mice.

456 We identified and isolated two of the immunotherapy resistant clones from the  
457 4T1 model, based on their unique barcodes. In depth analysis of these resistant  
458 clones demonstrated they had differential gene expression of key immune evasive  
459 pathways (MHC-I and PD-L1). Intratumoural heterogeneity (ITH) has previously  
460 been associated with immune evasion and resistance to immunotherapy in  
461 melanoma and lung cancer. Tumours with higher ITH were shown to be more  
462 resistant to immunotherapy (41, 42). McGranham and colleagues postulated that  
463 this was due to improved T cell killing of tumours with clonal neo-antigens.  
464 Another non-mutually exclusive explanation is that clonal tumours are less likely  
465 to contain cancer cells with a pre-existing resistance mechanism to  
466 immunotherapy. These findings refine the concept of cancer immunoediting,  
467 demonstrating that there are clonal populations of cancer cells with variable  
468 resistance to the immune system. Based on their phenotype these clones are  
469 either enriched or depleted by an active immune system and immunotherapy.

470 We identified a core overlapping gene expression profile between the  
471 immunotherapy resistant clones. The common upregulated gene signature  
472 showed a dramatic ability to stratify basal-like breast cancer patients into good  
473 and poor prognosis. This gene signature appeared to represent a novel immune

474 evasion pathway associated with poor prognosis. Aside from *Ppp1r15a* it did not  
475 have genes known to be associated with immune evasion, and in addition did not  
476 contain genes associated with other poor prognostic signatures such as  
477 proliferation or invasion.

478 Importantly as both T cells and NK cells are present during immunoediting in our  
479 model system this common signature likely enables the cancer cell clones to evade  
480 both T cells and NK cells. Interestingly our common signature did not strongly  
481 correlate with CTL infiltration as determined by TIDE analysis (39), indicating that  
482 this signature was not a surrogate for the lack of T cell infiltration. This also  
483 suggests these genes likely do not regulate immune evasion by influencing  
484 immune cell recruitment. These common genes may offer new insights into  
485 developing therapeutic approaches to improve immunotherapy response in  
486 breast cancer. One of the common immunotherapy resistance genes we identified  
487 was *PPP1R15A* that may be important in immunotherapy response. Our  
488 identification of *PPP1R15A* as elevated in immuno-resistant clones is consistent  
489 with its known role in immunogenic cell death in the response to chemotherapy  
490 (36). Some recent studies in another disease setting have demonstrated that this  
491 pathway can be targeted using a small molecule (Sephin-1), where it was used to  
492 treat a mouse model of multiple sclerosis (45). Future studies are necessary to  
493 examine whether this compound or others targeting this pathway could synergise  
494 with immunotherapy, or immunogenic chemotherapy to treat breast or other  
495 cancer types.

496 As breast cancers have a lower mutational burden than lung cancer and melanoma  
497 it is likely that epigenetic factors may play a greater role than mutational events  
498 in driving ITH in breast cancer. One current approach to improve immunotherapy  
499 response under investigation has been to combine immunotherapy with  
500 epigenetic targeting drugs such as decitabine and HDAC inhibitors (31, 43). This  
501 combination has been shown to lead to an upregulation of MHC protein expression  
502 and improved response to immunotherapy. However, the use of epigenetic drugs  
503 might have an additional effect of reducing ITH in certain immune evasion  
504 pathways. Thus, epigenetic drugs may reduce the diversity of clones and  
505 overcome other epigenetically driven immune evasion strategies as well as  
506 enhancing MHC expression (44). Further research is needed to test this hypothesis  
507 more fully. Our results, however, suggest that while demethylating agents could  
508 increase MHC-I expression in the MHC-I low immunotherapy resistant clone, they  
509 did not increase it above the baseline seen in the parental 4T1 cell line. This is  
510 corroborated by a recent study that demonstrated that while treating breast  
511 cancer patients with demethylating agents could increase MHC-I expression in  
512 most patients, a subset appeared resistant to this therapy (31). This suggests that  
513 while epigenetic treatments may improve the proportion of patients who respond  
514 to immunotherapy that in some cases pre-existing clones could still mediate  
515 resistance to this combination.

516 Some limitations of this study include the reliance on mouse cell line models, as  
517 these do not recapitulate the early stages of tumorigenesis and do not represent  
518 the full diversity of human breast cancer. However, syngeneic allograft models  
519 have delivered central insights about the immune response to cancer and  
520 demonstrated the utility of immunotherapies (46). A further limitation is that the  
521 integration of the barcode and selection markers into the genome and the

522 potential immunogenicity of the RFP could affect the phenotype of the cancer cells.  
523 In previous studies we and others have found some fluorophores and luciferase to  
524 be immunogenic and negatively affect tumour growth and metastasis in the 4T1  
525 model (24, 47). However, in this study we found that tumour growth and  
526 metastasis were unaffected by RFP expression. While the introduction of the DNA  
527 barcodes could have influenced the phenotype of the specific clones we feel that  
528 this is unlikely, with no dramatic impact on the expression of the genes closest to  
529 the integration site. Furthermore, none of the genes associated with each  
530 integration site came out as being significantly involved in cancer cell evasion of  
531 CD8 T cell responses in a recent CRISPR screen (15).

532 Overall this study has demonstrated that immunoediting occurs at the clonal level  
533 in primary tumours and that a second round of immunoediting occurs during  
534 metastasis. Immunotherapies dramatically enhanced immunoediting, however,  
535 pre-existing resistant populations were still responsible for relapse. The large  
536 reduction in clonal diversity following immunotherapy in the 4T1 model, a model  
537 that is known to be poorly responsive to immunotherapy, suggests that slight  
538 improvements through combination therapy could eliminate the remaining clones  
539 and lead to dramatic improvements in survival. By isolating immunotherapy  
540 resistant clones and phenotyping them, we identified common and distinct  
541 immune evasion pathways. We anticipate through the targeting of the pathways  
542 identified in this study, in particular the common pathways, it will be possible to  
543 further reduce the numbers of resistant clones and improve the efficacy of  
544 immunotherapies.

545

## 546 **Acknowledgments**

547

548 This work is supported by a research grants from The National Breast Cancer  
549 Foundation (NBCF) of Australia (IN-17-02; IIRS-19-106) and supported by the  
550 generosity of John McMurtrie (AM) and Deborah McMurtrie and The Petre  
551 Foundation. LAB is the recipient of an Australian Government research training  
552 (RTP) scholarship. AS is the recipient of a Senior Research Fellowship from the  
553 National Health and Medical Research Council of Australia. SJ is supported by a  
554 research fellowship from the NBCF. We acknowledge the contribution of Isabelle  
555 Shapiro and Cheryl Grant as consumer advocates.

556

557

## 558 **Methods:**

559 **Cells**

560 4T1 cells were obtained from ATCC. 4T1 cells were grown in RPMI (Gibco)  
561 supplemented with 10% FCS, D-Glucose, Sodium Pyruvate, 2mM HEPES, and  
562 Penicillin/Streptomycin. EMT6 cells were obtained from ATCC. EMT6 cells were  
563 grown in Waymouth's MB 752/1 Medium supplemented with 15% FCS and 2mM  
564 L-glutamine.

565

566 **Cellular DNA barcoding**

567 The ClonTracer library was a gift from Dr Frank Stegmeier (Addgene #67267).  
568 Lentiviral particles containing the high-complexity barcode library were  
569 produced by transfecting 293T cells. 4T1 and EMT6 cancer cell lines were  
570 barcoded by lentiviral infection using 0.8 µg/ml polybrene. Cells from each line,



571 were infected with a target MOI of 0.1, corresponding to 10% infectivity to ensure  
572 single lentiviral integration. Cells that received a barcode were then sorted based  
573 on the RFP reporter protein using a BD FACSAriaII, these cells were then expanded  
574 and frozen into a number of aliquots for the subsequent experiments. 4T1 cells  
575 were generated with two different barcode complexities, one with ~5000  
576 barcodes (4T1 BC5000) and one with ~300 000 barcodes.

577

578 Mice

579 All animal experiments were approved by the Garvan Institute of Medical  
580 Research/St. Vincent's Hospital Animal Experimentation Ethics Committee.

581 Immunocompetent BALB/c mice and immunocompromised NOD.Cg-*Prkdc<sup>scid</sup>*  
582 *Il2rg<sup>tm1Wjl</sup>/SzJ* (NSG) mice aged 6-to-8 weeks were obtained from Australian  
583 BioResources (Moss Vale, Australia) and housed at the Garvan Institute of Medical  
584 Research.

585

586 *In vivo* tumour growth

587 For tumour transplantation, barcoded EMT6 cells (ATCC, USA) were resuspended  
588 in Matrigel 2.5x10<sup>5</sup> cells in 100ul volume were injected into the 4<sup>th</sup> inguinal  
589 mammary gland; barcoded 4T1 cells (ATCC, USA) were resuspended in PBS and  
590 5x10<sup>4</sup> cells in a 10ul volume were injected into the 4<sup>th</sup> inguinal mammary fat pad.  
591 For studies with the 4T1 model primary tumours were surgically resected at day  
592 15. At resection or ethical endpoint tumours and metastatic lung tissue were  
593 removed, minced and snap frozen in liquid nitrogen for barcode analysis.

594

595 Immunotherapy treatment

596 Mice were treated with four 200ug doses of either combination immunotherapy  
597 antibodies via intraperitoneal injection: anti-CTLA4 (BE0032), anti-PD1  
598 (BE0146), or isotype control antibodies Armenian hamster IgG (BE0091), Rat IgG  
599 (BE0089) all from BioXCell (Lebanon, NH, USA). Antibodies were given every 2-3  
600 days from day 10 post tumour implantation for the EMT6 model and following  
601 resection on day 15 for the 4T1 model.

602

603 CD8 T cell and NK cell depletion

604 Starting one day prior to primary tumour resection mice were given 100ug of  
605 depleting antibodies for CD8 T cells (anti-CD8; BEO223; BioXCell), or NK cells  
606 (anti-Asialo-GM1; 986-10001; Novachem), or isotype control antibodies.  
607 Antibodies were then given every 2-3 days for a total of 4 doses.

608

609 DNA extraction

610 Frozen tissue samples were lysed in 5 ml QIAGEN buffer P1 (with RNaseA) and  
611 0.5% SDS within a Miltenyi M-Tube (# 130-096-335). Samples were processed  
612 on the gentleMACS or gentleMACS Octo using the RNA\_02 program. DNA was  
613 then extracted using a standard phenol/chloroform process.

614

615 Targeted Barcode PCR and Sequencing

616 All samples underwent targeted barcode PCR amplification according to the  
617 updated version of the original protocol (22) available on the Addgene website  
618 (<https://www.addgene.org/pooled-library/clontracer/>). Specific PCR products  
619 (180 bp) were gel purified, quantified by Qubit 2.0 fluorometer (ThermoFisher

620 Scientific, Waltham, MA USA) and pooled into a library. Prior to sequencing, an  
621 equal combination of additional PCR products containing two inverse barcodes  
622 (GACTCAGTGTCTCAGACTGAGTGTCTGACTGT and  
623 CTGAGTCACAGTCTGACTCACAGACTGACA) plus the PhiX Control V3 (Cat. FC-110-  
624 3001, Illumina, CA, USA) were spiked in to balance the nucleotide distribution  
625 within the library. Samples were sequenced using a custom sequencing primer  
626 (GCGACCACCGAGATCTACACACTGACTGCAGTCTGAGTCTGACAG) and the  
627 NextSeq® 500/550 Mid Output Kit v2 - 150 cycles (FC-404-2002, Illumina, CA,  
628 USA) on the Illumina NextSeq® platform.

629

### 630 Barcode Analysis

631 Barcode composition analysis and calculation of barcode overlap between  
632 samples was performed as indicated in the original protocol (22) and updated  
633 Python scripts available from the Addgene website  
634 (<https://www.addgene.org/pooled-library/clontracer/>).

635 Further analysis was performed using R statistical framework and packages  
636 EntropyExplorer for analysis of differential Shannon Entropy (48), DEBRA for  
637 differential barcode expression (49), and libraries fishplot and UpSetR for  
638 visualisation purposes.

639

### 640 Generating clonal cell lines

641 Cells of interest were isolated from the barcoded parental population using a sub-  
642 pooling approach.

643 The barcoded 4T1 BC5000 cells were seeded into a 96 well plate at a density of  
644 150 cells per well. At approximately 80% confluence, cells were trypsinised and  
645 split identically into two plates. One plate was viably frozen in freezing media  
646 (10% DMSO, 40% FCS, 50% 4T1 media). DNA was extracted from one plate using  
647 the Promega SV Wizard Genomic DNA kit. Target barcodes of each sample were  
648 PCR amplified and sequenced using the method described above.

649 After sequencing, wells containing cells with the target barcodes were thawed,  
650 pooled and seeded at 40 cells/well in a 96 well plate. Media was changed every  
651 three days for 8 days before cells were split into two identical plates as above. One  
652 plate was viably frozen in freezing media, while DNA was extracted and prepared  
653 for targeted sequencing as above.

654 Wells with the highest proportion of target barcodes were revived into a 6 well  
655 plate and grown for 4 days before being single-cell sorted by BD FACSAria II into  
656 96 well plate. Sorted single cells were grown in conditioned media for 5 days  
657 before being changed to 4T1 media and grown until 80% confluence. As  
658 previously, cells were lifted and split identically into two plates – one for freezing  
659 and one for targeted sequencing.

660 Once wells containing single cells clones of the cells of interest were identified,  
661 target wells were revived. Cells were expanded before being aliquoted and viably  
662 frozen for future experiments.

663 Barcoded sequences of isolated cells were confirmed by targeted Sanger  
664 sequencing of barcode regions.

665

### 666 Bulk RNA sequencing

667 RNA was extracted from established subclonal cell lines using the QIAGEN RNeasy  
668 Mini Kit. 3-4 unique clonal cell populations were sequenced for each barcode.

669 Libraries were prepared using the KAPA RNA HyperPrep Kit with RiboErase, and  
670 sequenced on the NextSeq500 platform using a High Output V2.5 300 cycle kit.

671

672 Transcriptome analysis

673 FastQ files from sequencing libraries were first trimmed with FASTQC v0.11

674 *Andrews S. (2010). FastQC: a quality control tool for high throughput sequence data.*

675 Available online at: <http://www.bioinformatics.babraham.ac.uk/projects/fastqc>.

676 Raw reads were subsequently mapped to the mouse transcriptome (Gencode

677 release M9, GRCm38.p4), to the mouse genome (mm10 assembly), with STAR

678 aligner v.2.4.1d, allowing for multimapping reads (50). The reads were counted

679 over gene models with RSEM, v.1.2.18 (51). Differentially expressed genes and

680 repeat elements were defined with EdgeR with FDR<0.01 (52).

681

682 Survival analysis

683 To assess the clinical relevance of our isolated immune evasion clones, we

684 assessed the association between the gene signatures derived from our bulk RNA-

685 Sequencing studies with the overall survival of basal (PAM50) breast cancer

686 patients from the METABRIC and The Cancer Genome Atlas (TCGA;

687 <https://www.cancer.gov/tcga>) cohorts. Mouse gene signatures were first

688 converted to human orthologs using the biomaRt package (53). Shared up-

689 regulated genes across both immune evasion clones IE1 and IE2 were then

690 filtered, and only genes detected in each expression cohort were considered. For

691 each tumour from the bulk cohort, signature scores were computed based on the

692 average expression of the top 25 genes ranked by log fold change. Patients were

693 then stratified based on the signatures scores into the top 30%, middle 40% and

694 bottom 30% groups. Survival curves were generated using the Kaplan Meier

695 method with the 'survival' package in R ([https://cran.r-](https://cran.r-project.org/package=survival)

696 [project.org/package=survival](https://cran.r-project.org/package=survival)). The Cox proportional hazards model was used to

697 compute Hazard Ratios. We assessed the significance between groups using the

698 log-rank test statistics.

699

700 Whole genome sequencing

701 DNA was extracted from established subclonal cell lines using the QIAGEN DNeasy

702 blood & tissue kit. Libraries were prepared using the Roche KAPA PCR-free library

703 preparation kit and genomes were sequenced on the HiSeq X platform to a depth

704 of ~30x.

705

706 Whole genome analysis

707 Fastq files from the WGS were firstly aligned to mouse genome reference mm10.

708 The output bam files were subsequently used for copy number analysis. Copy

709 number analysis was performed using a R package cn.mops (54) in "paired mode"

710 with a window length of 10kb. Reads were aligned to the BALB/c reference

711 genome using BWA before being indexed and sorted with Novosort. Reads that

712 mapped incompletely to the reference genome were then mapped to the barcode

713 plasmid sequence with BWA and sorted and indexed with Novosort. Read pairs

714 where only one pair mapped to the barcode plasmid sequence were blasted

715 against mm10 to establish the barcode plasmid insertion site.

716

717

718 Flow cytometry for MHC1 and PD-L1

719 The 4T1 subclones (IE1, IE2, NT1, NT2), as well as the parental 4T1 bulk  
720 population were revived and passaged three times before being seeded into a 6  
721 well plate at a density of 200 000 cells per well. At approximately 80% confluence,  
722 cells were collected into FACS buffer (DPBS supplemented with 2% FCS and 2%  
723 HEPEs) for flow cytometry. Cells were stained with a mastermix of APC conjugated  
724 anti-mouse CD274 (Biolegend) and Alexa Fluor488 conjugated anti-mouse H2-kD  
725 (Biolegend) at a final concentration of 1:200 for 20 minutes. Cells were washed  
726 three times with FACS buffer before being stained with DAPI and run on the BD  
727 FACSCanto II flow cytometer, utilising BD FACSDIVA software. Data was analysed  
728 in FlowJo (version 10.6.1) and median fluorescence intensity of live, single cells  
729 was calculated.

730

731 Treating cells with 5-Aza-2'-deoxycytidine and flow cytometry for MHC-I

732 5-Aza-2'-deoxycytidine (5aza) was sourced from Sigma and reconstituted in  
733 DMSO according to manufacturer's instructions. Subclones (IE1, IE2) and the  
734 parental 4T1 cell line were seeded into a 24 well plate at a density of 8000 cells  
735 per well in 4T1 media (previously described). Cells were allowed to settle  
736 overnight before being treated with 5aza at 200nM, 100nM or 50nM for 72 hours.  
737 5aza was removed and cells were cultured in media only for 24 hours before being  
738 collected for flow analysis. Cells were stained with Alexa Fluor488 conjugated  
739 anti-mouse H2-kD (Biolegend) at a concentration of 1:200 in FACS buffer for 20  
740 minutes. Cells were washed three times after staining before being stained with  
741 DAPI. Data was collected using the BC FACSCanto II flow cytometer with BD  
742 FACSDIVA software. The resulting data was analysed using FlowJo (version  
743 10.6.1) and media fluorescence intensity of live, single cells was calculated.

744

745 Treating cells with interferon gamma and flow cytometry for MHC-I

746 Active mouse interferon gamma (IFN $\gamma$ ) was sourced from Abcam and  
747 reconstituted in sterile water, as per manufacturer's instructions. Subclones (IE1,  
748 IE2) and the parental 4T1 cell line were grown in a 24 well plate until  
749 approximately 70% confluence was achieved. Cells were then treated with IFN $\gamma$   
750 (100ng/ml) for 24 hours. Cells were stained with Alexa Fluor488 conjugated anti-  
751 mouse H2-kD (Biolegend) at a concentration of 1:200 in FACS buffer for 20  
752 minutes. Cells were washed three times before being stained with DAPI. Data was  
753 generated using the BC FCSCanto II flow cytometer with BD FACSDIVA software.  
754 Analysis was carried out using FlowJo (version 10.6.1) and median fluorescence  
755 intensity of live single cells was calculated.

756

## 757 **References:**

758

- 759 1. D. Hanahan, Robert A. Weinberg, Hallmarks of Cancer: The Next  
760 Generation. *Cell* **144**, 646-674 (2011).
- 761 2. R. D. Schreiber, L. J. Old, M. J. Smyth, Cancer Immunoediting: Integrating  
762 Immunity's Roles in Cancer Suppression and Promotion. *Science* **331**,  
763 1565-1570 (2011).
- 764 3. M. Angelova *et al.*, Evolution of Metastases in Space and Time under  
765 Immune Selection. *Cell* **175**, 751-765.e716 (2018).



- 766 4. S. C. Casey *et al.*, MYC regulates the antitumor immune response through  
767 CD47 and PD-L1. *Science* **352**, 227-231 (2016).
- 768 5. D. M. Pardoll, The blockade of immune checkpoints in cancer  
769 immunotherapy. *Nature Reviews Cancer* **12**, 252-264 (2012).
- 770 6. P. Sharma, S. Hu-Lieskovan, J. A. Wargo, A. Ribas, Primary, Adaptive, and  
771 Acquired Resistance to Cancer Immunotherapy. *Cell* **168**, 707-723 (2017).
- 772 7. L. Galluzzi, T. A. Chan, G. Kroemer, J. D. Wolchok, A. López-Soto, The  
773 hallmarks of successful anticancer immunotherapy. *Science Translational*  
774 *Medicine* **10**, (2018).
- 775 8. P. Schmid *et al.*, Atezolizumab and Nab-Paclitaxel in Advanced Triple-  
776 Negative Breast Cancer. *New England Journal of Medicine* **379**, 2108-2121  
777 (2018).
- 778 9. H. R. Ali, L. Chlon, P. D. P. Pharoah, F. Markowitz, C. Caldas, Patterns of  
779 Immune Infiltration in Breast Cancer and Their Clinical Implications: A  
780 Gene-Expression-Based Retrospective Study. *PLOS Medicine* **13**, e1002194  
781 (2016).
- 782 10. E. T. E. Gross *et al.*, Immunosurveillance and immunoediting in MMTV-  
783 PyMT-induced mammary oncogenesis. *Oncoimmunology* **6**, e1268310  
784 (2017).
- 785 11. C. M. Koebel *et al.*, Adaptive immunity maintains occult cancer in an  
786 equilibrium state. *Nature* **450**, 903-907 (2007).
- 787 12. I. Milo *et al.*, The immune system profoundly restricts intratumor genetic  
788 heterogeneity. *Science Immunology* **3**, (2018).
- 789 13. H. Matsushita *et al.*, Cancer exome analysis reveals a T-cell-dependent  
790 mechanism of cancer immunoediting. *Nature* **482**, 400-404 (2012).
- 791 14. K.-J. Malmberg *et al.*, Natural killer cell-mediated immunosurveillance of  
792 human cancer. *Seminars in Immunology* **31**, 20-29 (2017).
- 793 15. K. A. Lawson *et al.*, Functional genomic landscape of cancer-intrinsic  
794 evasion of killing by T cells. *Nature*, (2020).
- 795 16. R. T. Manguso *et al.*, In vivo CRISPR screening identifies Ptpn2 as a cancer  
796 immunotherapy target. *Nature* **547**, 413 (2017).
- 797 17. C.-Q. Song *et al.*, Genome-Wide CRISPR Screen Identifies Regulators of  
798 Mitogen-Activated Protein Kinase as Suppressors of Liver Tumors in Mice.  
799 *Gastroenterology* **152**, 1161-1173.e1161 (2017).
- 800 18. G. Wang *et al.*, CRISPR-GEMM Pooled Mutagenic Screening Identifies  
801 KMT2D as a Major Modulator of Immune Checkpoint Blockade. *Cancer*  
802 *Discovery* **10**, 1912-1933 (2020).
- 803 19. S. J. Patel *et al.*, Identification of essential genes for cancer immunotherapy.  
804 *Nature* **548**, 537-542 (2017).
- 805 20. N. Anfossi *et al.*, Human NK Cell Education by Inhibitory Receptors for MHC  
806 Class I. *Immunity* **25**, 331-342 (2006).
- 807 21. E. Mamessier *et al.*, Human breast cancer cells enhance self tolerance by  
808 promoting evasion from NK cell antitumor immunity. *The Journal of Clinical*  
809 *Investigation* **121**, 3609-3622 (2011).
- 810 22. H.-e. C. Bhang *et al.*, Studying clonal dynamics in response to cancer therapy  
811 using high-complexity barcoding. *Nat Med* **21**, 440-448 (2015).
- 812 23. E. Wagenblast *et al.*, A model of breast cancer heterogeneity reveals  
813 vascular mimicry as a driver of metastasis. *Nature* **520**, 358-362 (2015).

- 814 24. A. Gambotto *et al.*, Immunogenicity of enhanced green fluorescent protein  
815 (EGFP) in BALB/c mice: identification of an H2-Kd-restricted CTL epitope.  
816 *Gene Therapy* **7**, 2036-2040 (2000).
- 817 25. Y. Lan *et al.*, Enhanced preclinical antitumor activity of M7824, a  
818 bifunctional fusion protein simultaneously targeting PD-L1 and TGF- $\beta$ .  
819 *Science Translational Medicine* **10**, (2018).
- 820 26. M. Ouzounova *et al.*, Monocytic and granulocytic myeloid derived  
821 suppressor cells differentially regulate spatiotemporal tumour plasticity  
822 during metastatic cascade. *Nature Communications* **8**, 14979 (2017).
- 823 27. X. Peng, L. Zha, A. Chen, Z. Wang, HOXA5 is a tumor suppressor gene that is  
824 decreased in gastric cancer. *Oncol Rep* **40**, 1317-1329 (2018).
- 825 28. R. E. Vance, J. R. Kraft, J. D. Altman, P. E. Jensen, D. H. Raulet, Mouse  
826 CD94/NKG2A Is a Natural Killer Cell Receptor for the Nonclassical Major  
827 Histocompatibility Complex (MHC) Class I Molecule Qa-1b. *Journal of*  
828 *Experimental Medicine* **188**, 1841-1848 (1998).
- 829 29. M. M. S. Obradović *et al.*, Glucocorticoids promote breast cancer metastasis.  
830 *Nature* **567**, 540-544 (2019).
- 831 30. D. Pan, M. Kocherginsky, S. D. Conzen, Activation of the Glucocorticoid  
832 Receptor Is Associated with Poor Prognosis in Estrogen Receptor-Negative  
833 Breast Cancer. *Cancer Research* **71**, 6360-6370 (2011).
- 834 31. N. Luo *et al.*, DNA methyltransferase inhibition upregulates MHC-I to  
835 potentiate cytotoxic T lymphocyte responses in breast cancer. *Nature*  
836 *Communications* **9**, 248 (2018).
- 837 32. D. Blanco-Melo *et al.*, Imbalanced Host Response to SARS-CoV-2 Drives  
838 Development of COVID-19. *Cell* **181**, 1036-1045.e1039 (2020).
- 839 33. C. Curtis *et al.*, The genomic and transcriptomic architecture of 2,000 breast  
840 tumours reveals novel subgroups. *Nature* **486**, 346-352 (2012).
- 841 34. N. The Cancer Genome Atlas, Comprehensive molecular portraits of human  
842 breast tumours. *Nature* **490**, 61 (2012).
- 843 35. S. Dushyanthen *et al.*, Relevance of tumor-infiltrating lymphocytes in  
844 breast cancer. *BMC Medicine* **13**, 202 (2015).
- 845 36. M. Obeid *et al.*, Calreticulin exposure dictates the immunogenicity of cancer  
846 cell death. *Nature Medicine* **13**, 54-61 (2007).
- 847 37. N. Ishikawa *et al.*, Characterization of SEZ6L2 cell-surface protein as a novel  
848 prognostic marker for lung cancer. *Cancer Science* **97**, 737-745 (2006).
- 849 38. L. Wang *et al.*, Upregulated Seizure-Related 6 Homolog-Like 2 Is a  
850 Prognostic Predictor of Hepatocellular Carcinoma. *Disease Markers* **2020**,  
851 7318703 (2020).
- 852 39. P. Jiang *et al.*, Signatures of T cell dysfunction and exclusion predict cancer  
853 immunotherapy response. *Nature Medicine* **24**, 1550-1558 (2018).
- 854 40. A. W. Zhang *et al.*, Interfaces of Malignant and Immunologic Clonal  
855 Dynamics in Ovarian Cancer. *Cell*, (2018).
- 856 41. N. McGranahan *et al.*, Clonal neoantigens elicit T cell immunoreactivity and  
857 sensitivity to immune checkpoint blockade. *Science* **351**, 1463-1469  
858 (2016).
- 859 42. Y. Wolf *et al.*, UVB-Induced Tumor Heterogeneity Diminishes Immune  
860 Response in Melanoma. *Cell* **179**, 219-235.e221 (2019).

- 861 43. K. B. Chiappinelli, C. A. Zahnow, N. Ahuja, S. B. Baylin, Combining Epigenetic  
862 and Immunotherapy to Combat Cancer. *Cancer Research* **76**, 1683-1689  
863 (2016).
- 864 44. M. Guo, Y. Peng, A. Gao, C. Du, J. G. Herman, Epigenetic heterogeneity in  
865 cancer. *Biomarker Research* **7**, 23 (2019).
- 866 45. Y. Chen *et al.*, Sepsin1, which prolongs the integrated stress response, is a  
867 promising therapeutic for multiple sclerosis. *Brain* **142**, 344-361 (2019).
- 868 46. D. R. Leach, M. F. Krummel, J. P. Allison, Enhancement of Antitumor  
869 Immunity by CTLA-4 Blockade. *Science* **271**, 1734-1736 (1996).
- 870 47. V. P. Baklaushev *et al.*, Luciferase Expression Allows Bioluminescence  
871 Imaging But Imposes Limitations on the Orthotopic Mouse (4T1) Model of  
872 Breast Cancer. *Scientific Reports* **7**, 7715 (2017).
- 873 48. K. Wang, C. A. Phillips, A. M. Saxton, M. A. Langston, EntropyExplorer: an R  
874 package for computing and comparing differential Shannon entropy,  
875 differential coefficient of variation and differential expression. *BMC*  
876 *Research Notes* **8**, 832 (2015).
- 877 49. Y. Akimov, D. Bulanova, S. Timonen, K. Wennerberg, T. Aittokallio,  
878 Improved detection of differentially represented DNA barcodes for high-  
879 throughput clonal phenomics. *Molecular Systems Biology* **16**, e9195 (2020).
- 880 50. A. Dobin *et al.*, STAR: ultrafast universal RNA-seq aligner. *Bioinformatics*  
881 **29**, 15-21 (2012).
- 882 51. B. Li, C. N. Dewey, RSEM: accurate transcript quantification from RNA-Seq  
883 data with or without a reference genome. *BMC Bioinformatics* **12**, 323  
884 (2011).
- 885 52. M. D. Robinson, D. J. McCarthy, G. K. Smyth, edgeR: a Bioconductor package  
886 for differential expression analysis of digital gene expression data.  
887 *Bioinformatics* **26**, 139-140 (2009).
- 888 53. S. Durinck, P. T. Spellman, E. Birney, W. Huber, Mapping identifiers for the  
889 integration of genomic datasets with the R/Bioconductor package  
890 biomaRt. *Nature Protocols* **4**, 1184-1191 (2009).
- 891 54. G. Klambauer *et al.*, cn.MOPS: mixture of Poissons for discovering copy  
892 number variations in next-generation sequencing data with a low false  
893 discovery rate. *Nucleic Acids Research* **40**, e69-e69 (2012).

894

### 895 **Figure legends:**

896 Fig 1: Experimental workflow schematic. Barcode library is introduced into  
897 mammary carcinoma cell lines *in vitro* at a low multiplicity of infection (MOI). Cells  
898 are sorted based on RFP expression to select for those that have incorporated a  
899 barcode. Barcoded cells are then transplanted into the mammary fat pad.  
900 Following immunoselection either with the endogenous immune system or  
901 immunotherapy then barcode abundance and diversity are analysed within the  
902 primary tumours and metastatic lungs.

903

904 Fig 2: Immune selection and clonal immunoediting of EMT6 primary tumours.

905 A. Outline of experimental design. B. EMT6 primary tumour growth plotted as  
906 tumour volume comparing wild-type Balb/c mice with immunocompromised NSG  
907 mice. Average volume +/- SEM; n=5-6 mice per group. C. Kaplan-Meier survival  
908 analysis comparing Balb/c and NSG EMT6 tumour bearing mice (Mantel-Cox  
909 p=0.009). D. EMT6 primary tumour growth plotted as tumour volume comparing

910 wild-type Balb/c mice with or without immunotherapy (anti-PD1+anti-CTLA4) IP  
911 on days 10, 12, 14, and 17 indicated with red arrows. Average volume +/- SEM;  
912 n=5-6 mice. E. Kaplan-Meier survival analysis comparing immunotherapy treated  
913 and isotype control treated Balb/c EMT6 tumour bearing mice (Mantel-Cox  
914  $p=0.0006$ ). F. Number of unique barcodes identified in EMT6 primary tumours  
915 grown in NSG mice, and Balb/c mice treated with isotype control antibodies or  
916 anti-PD1 + anti-CTLA4. Unpaired t-test. G. Shannon diversity index analysis  
917 comparing NSG mice with Balb/c mice treated with isotype control antibodies or  
918 anti-PD1 + anti-CTLA4. Unpaired t-test. H. Dot plot of a subset of barcodes with  
919 interesting patterns of enrichment.

920

921 Fig 3: Immune selection and clonal immunoediting in the metastatic setting  
922 utilising the 4T1 model.

923 A. Outline of experimental design. B. Kaplan-Meier survival analysis comparing  
924 Balb/c and NSG 4T1 tumour bearing mice; n=5 mice/group ( $p = 0.0002$ , Mantel-  
925 Cox Log-rank test). C. Kaplan-Meier survival analysis comparing immunotherapy  
926 treated and isotype control treated Balb/c 4T1 tumour bearing mice. IP on days  
927 15, 17, 19, and 21 indicated with red arrows; n=5-6 mice/group ( $p = 0.0141$ ,  
928 Mantel-Cox Log-rank test). D. Number of unique barcodes identified in 4T1  
929 primary tumours and lung metastases grown in NSG mice or Balb/c mice.  
930 Unpaired t-test. E. Number of unique barcodes identified in 4T1 primary tumours  
931 and lung metastases grown in Balb/c mice treated with isotype control antibodies  
932 or anti-PD1 + anti-CTLA4. Unpaired t-test. F. Shannon diversity index analysis  
933 comparing primary tumours from NSG mice with Balb/c mice and lung metastases  
934 from NSG mice, Balb/c mice, isotype control treated Balb/c mice, and anti-PD1 +  
935 anti-CTLA4 treated Balb/c mice. Unpaired t-test. G. Analysis of number of unique  
936 barcodes in the metastatic lungs of mice treated with control antibodies, or anti-  
937 CD8a, or anti-asialo GM1. CD8 T cells depleted with anti-CD8a, NK cells depleted  
938 with anti-asialo GM1. Unpaired t-test, 5 mice/group.

939

940 Fig 4: Analysis of specific barcodes enriched or depleted by the immune system  
941 and immunotherapy in the 4T1 model.

942 A. Unsupervised hierarchical clustering heatmap of barcodes with an abundance  
943 of above 5% in at least one 4T1 primary tumour or lung metastatic sample; \*  
944 indicate barcodes detected at a frequency above 0.1% in a particular sample. B.  
945 Dot plot of a subset of specific barcodes. C. Fishplot of the nine most abundant  
946 barcodes detected in lungs of WT and NSG mice each barcode is given a unique  
947 colour with the remaining barcodes being combined and being represented in  
948 grey. D. Fishplot of the nine most abundant barcodes detected in the lungs of WT  
949 mice treated with combination immunotherapy or control antibodies, a  
950 bottleneck has been introduced between primary tumour and lung metastases to  
951 depict transition through the blood stream.

952

953 Fig 5: Gene expression analysis of immunotherapy resistant clones.

954 A. Volcano plot showing differentially expressed genes between parental 4T1 cells  
955 and the immunotherapy enriched 1 (IE1) clone. B. Volcano plot showing  
956 differentially expressed genes between parental 4T1 cells and the immunotherapy  
957 enriched 2 (IE2) clone. C. Expression of MHC related genes co-ordinately down-  
958 regulated in clone IE1, measured as transcripts per million (TPM) in the parental



959 4T1 population and in the specific cell clones; unpaired t-test. D. MHC1 protein  
960 expression as quantified by flow cytometry in the specific clones and the parental  
961 4T1 population measured as mean fluorescence intensity (MFI); representative  
962 histogram showing each immune enriched clone and the parental cells on the  
963 right; unpaired t-test. E. Expression of immune related genes up-regulated in clone  
964 IE2, measured as transcripts per million (TPM) in the parental 4T1 population and  
965 in the specific cell clones; unpaired t-test. F. PD-L1 protein expression as  
966 determined by flow cytometry in the specific clones and the parental 4T1  
967 population measured as mean fluorescence intensity (MFI), representative plot of  
968 three independent experiments; unpaired t-test.

969

970 Fig 6. Overlapping gene signatures of the immunotherapy resistant clones show  
971 prognostic significance in basal-like breast cancer patients.

972 A. Upset plots and Venn diagrams showing the overlap in significantly up-  
973 regulated (right) and down-regulated (left) genes between the two  
974 immunotherapy enriched clones and two other control clones. B. Heatmap of the  
975 top 50 overlapping up regulated and down regulated genes between the IE1 and  
976 IE2 clones across all the clonal cell lines. C. Kaplan-Meier survival analysis of basal-  
977 like breast cancer patients from the METABRIC cohort, examining overall survival  
978 with patients split based on the top 30% and bottom 30% expression of the  
979 overlapping upregulated 25 gene signature. D. Kaplan-Meier survival analysis of  
980 basal-like breast cancer patients from the TCGA cohort, examining overall survival  
981 with patients split based on the top 30% and bottom 30% expression of the  
982 overlapping upregulated 25 gene signature. The Cox proportional hazards model  
983 was used to compute Hazard Ratios. Significance between stratification groups  
984 were computed using log-rank test statistics.

985

#### 986 **Supplementary Figure Legends:**

987 Sup Fig1. 4T1 primary tumour growth or barcode diversity unchanged in  
988 immunocompromised mice. A. Primary tumour mass was slightly increased in  
989 immunocompromised NSG mice. B. Total number of unique barcodes identified in  
990 the primary tumours of Balb/c or NSG mice. C. Shannon diversity analysis  
991 comparing primary tumours from Balb/c and NSG mice.

992

993 Sup Fig2. Depletion of CD8+ T cells or NK cells does not significantly affect survival  
994 in 4T1 tumour bearing mice. CD8 T cells depleted with anti-CD8a, NK cells  
995 depleted with anti-asialo GM1. A. Kaplan-Meier survival analysis of Balb/c mice  
996 transplanted with 4T1 cells, primary tumour was resected on day 15. Cell  
997 depletion was initiated 1 day prior to resection on day 14.

998

999 Sup Fig3. Analysis of higher complexity barcode library in the 4T1 cells replicates  
1000 changes in barcode proportions that were seen in the ~5000 barcode library. A.  
1001 Number of unique barcodes identified in 4T1 primary tumours and lung  
1002 metastases grown in NSG mice or Balb/c mice. Unpaired t-test. 5 mice/group. B.  
1003 Number of unique barcodes identified in 4T1 primary tumours and lung  
1004 metastases grown in Balb/c mice treated with isotype control antibodies or anti-  
1005 PD1 + anti-CTLA4. Unpaired t-test. 5 mice/group.

1006

1007 Sup Fig 4. 4T1 clonal cell lines growth kinetics *in vitro*. Growth kinetics as  
1008 measured by percentage confluence over time.

1009

1010 Sup Fig 5. A. No genomic loss was observed in any of the clones at the MHC-I locus  
1011 on chromosome 17. B. Gene expression changes in genes that have a single copy  
1012 number increase were observed in IE1 and IE2 but not NT2.

1013

1014

1015 Sup Fig 6. MHC regulation by 5-aza and IFN- $\gamma$  in the clonal cell lines. A. 5-aza  
1016 treatment of clonal cell lines increases MHC-I protein expression in a dose  
1017 dependent manner in all cell lines as measured by flow cytometry. Unpaired t-  
1018 test. B. IFN- $\gamma$  treatment of clonal cell lines increases MHC-I protein expression in  
1019 all cell lines.

1020

1021 Sup Fig 7. Gene set enrichment analysis of the overlapping genes between the IE1  
1022 and IE2 clones. Red indicates gene sets with a significant

1023

#### 1024 **Supplementary Table Legends:**

1025 Sup Table 1: DNA barcode insertion sites of IE1 and IE2. By searching the whole  
1026 genome sequencing (WGS) data and identifying read pairs where only one read  
1027 mapped to the barcode sequence, the matching mate was blasted against mm10  
1028 to identify the barcode plasmid insertion site. Both barcodes were found to reside  
1029 in introns of cancer-related genes but there was no difference in expression of  
1030 these genes detected.

1031

1032 Sup Table 2: Copy number variation (CNV) locations found within all subclones.  
1033 By analysing whole genome sequencing data in R using the `cn.mops` packages,  
1034 copy number variations could be determined. No major copy number aberrations  
1035 were detected across the clones, although a single copy number gain was detected  
1036 in IE1, IE2 and NT2.

1037

1038 Sup Table 3. List of genes differentially expressed in IE1 compared to parental 4T1  
1039 bulk. Differentially expressed genes (DEGs) were generated by analyzing bulk  
1040 RNA sequencing data using R and the EdgeR package. DEGs were filtered for  
1041 significance based on a FDR <0.05.

1042

1043 Sup Table 4. List of genes differentially expressed in IE2 compared to parental 4T1  
1044 bulk. Differentially expressed genes (DEGs) were generated by analyzing bulk  
1045 RNA sequencing data using R and the EdgeR package. DEGs were filtered for  
1046 significance based on a FDR <0.05. A greater number of differentially expressed  
1047 genes were detected in IE2 than IE1.

1048

1049 Sup Table 5. All significantly enriched gene sets found in IE1. Differentially  
1050 expressed genes generated from comparing IE1 to bulk were preranked by fold  
1051 change before searching for gene set enrichment using the Molecular Signature  
1052 Database (MSigDB) across all available collections. Gene sets were filtered for  
1053 significance based on a FDR<0.05.

1054

1055 Sup Table 6. All significantly enriched gene sets found in IE2. Differentially  
1056 expressed genes generated from comparing IE2 to bulk were preranked by fold  
1057 change. Gene set enrichment was carried out using Molecular Signature Database  
1058 (MSigDB) across all available collections. Gene sets were filtered for significance  
1059 based on a  $FDR < 0.05$

1060

1061 Sup Table 7: List of common differentially expressed genes found in IE1 and IE2.  
1062 Commonly differentially expressed genes (DEGs) were determined by  
1063 overlapping significant DEGs in IE1 and IE2 by gene name. An average fold change  
1064 was calculated across the two samples.

1065

1066 Sup Table 8: Top significantly enriched gene sets found from common  
1067 differentially expressed genes in IE1 and IE2. The fold change of the common  
1068 differentially expressed genes in IE1 and IE2 were averaged together to generate  
1069 an average fold change across both IE1 and IE2. The gene list was then preranked  
1070 before searching for gene set enrichment using Molecular Signature Database  
1071 (MSigDB) across the C2 All collection. Gene sets were filtered for significance  
1072 based on a  $FDR < 0.05$ . The majority of significant gene sets that were returned  
1073 were negatively enriched in IE1 and IE2.

1074

1075

Figure 1

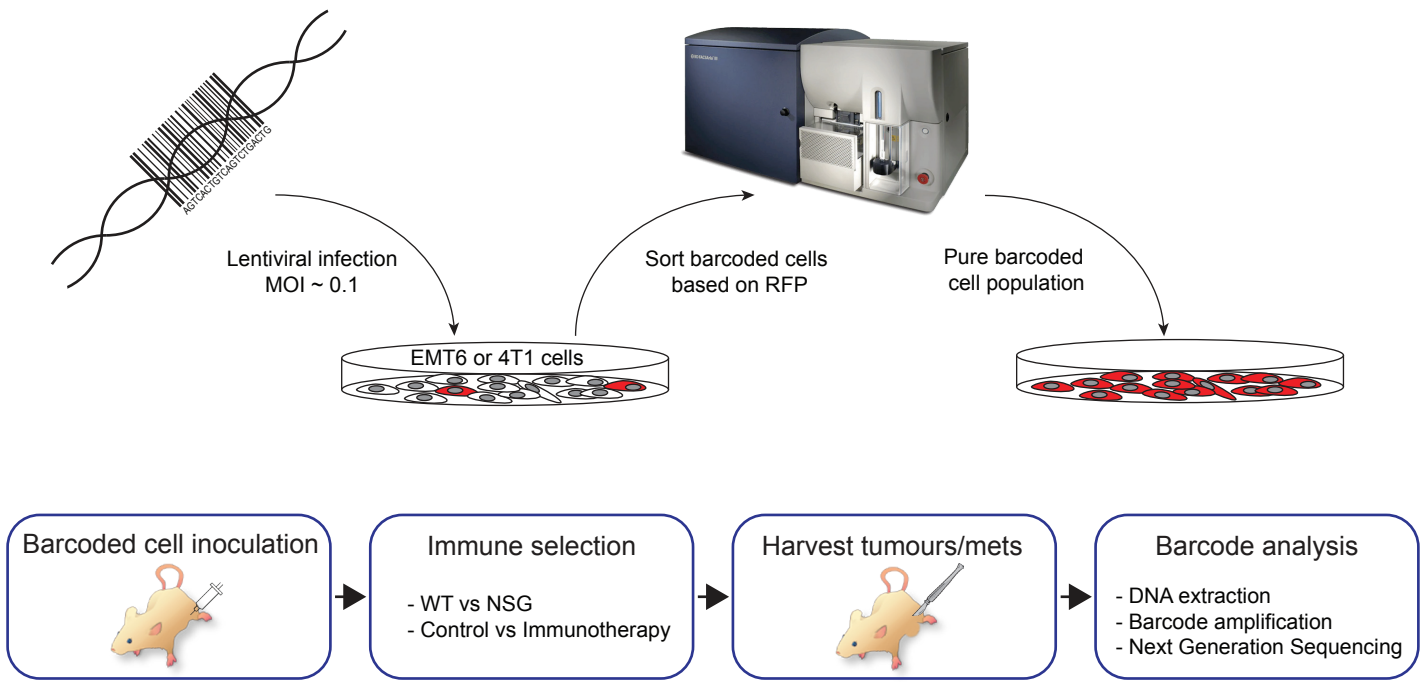



Figure 2

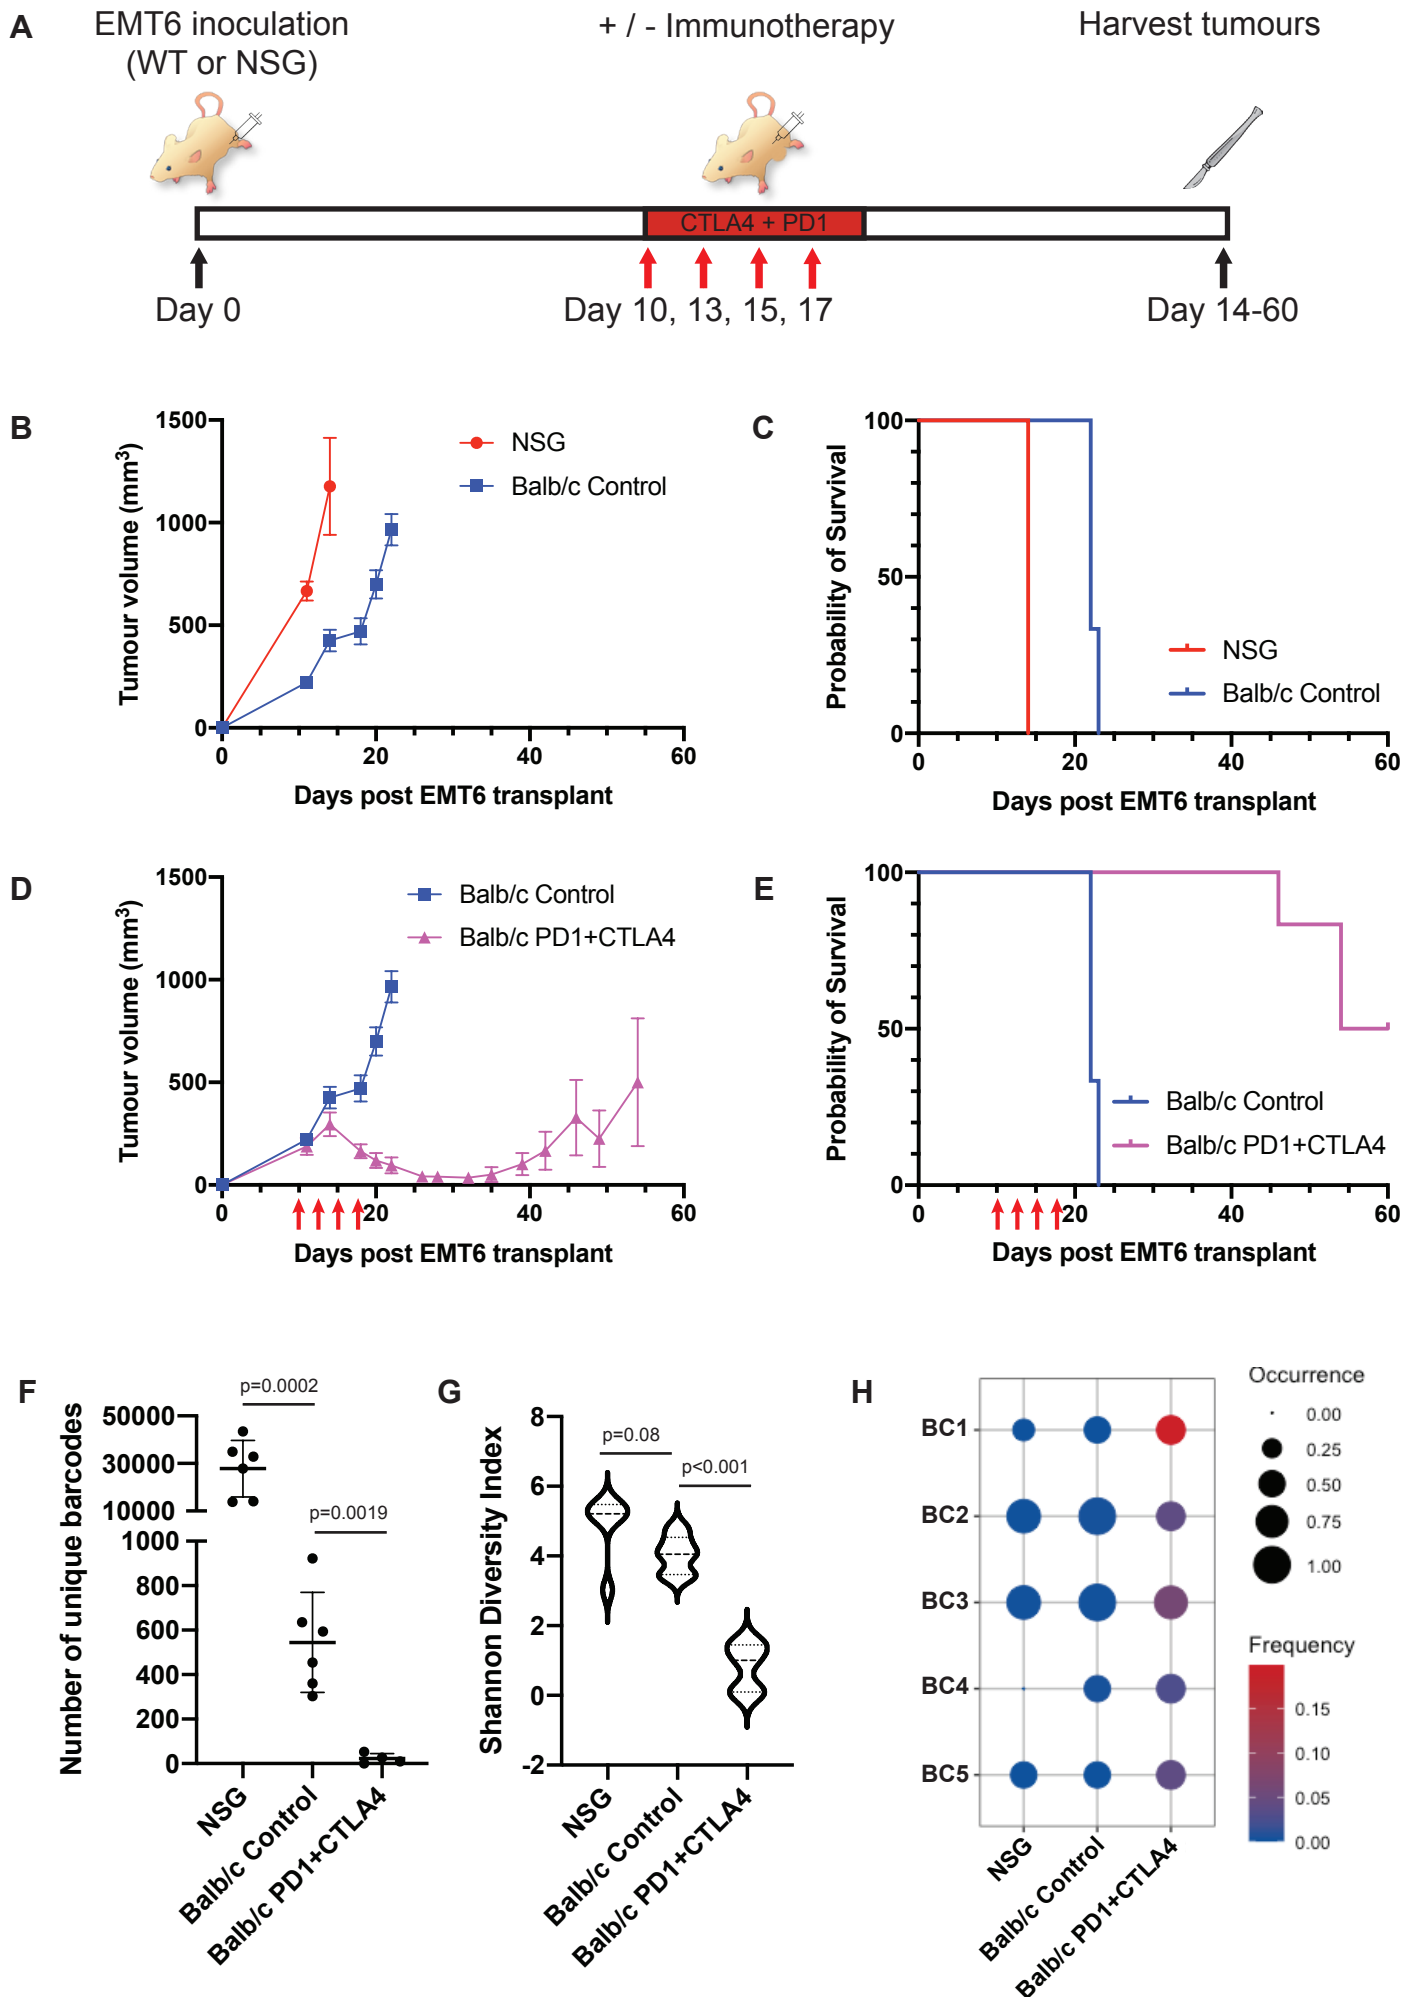

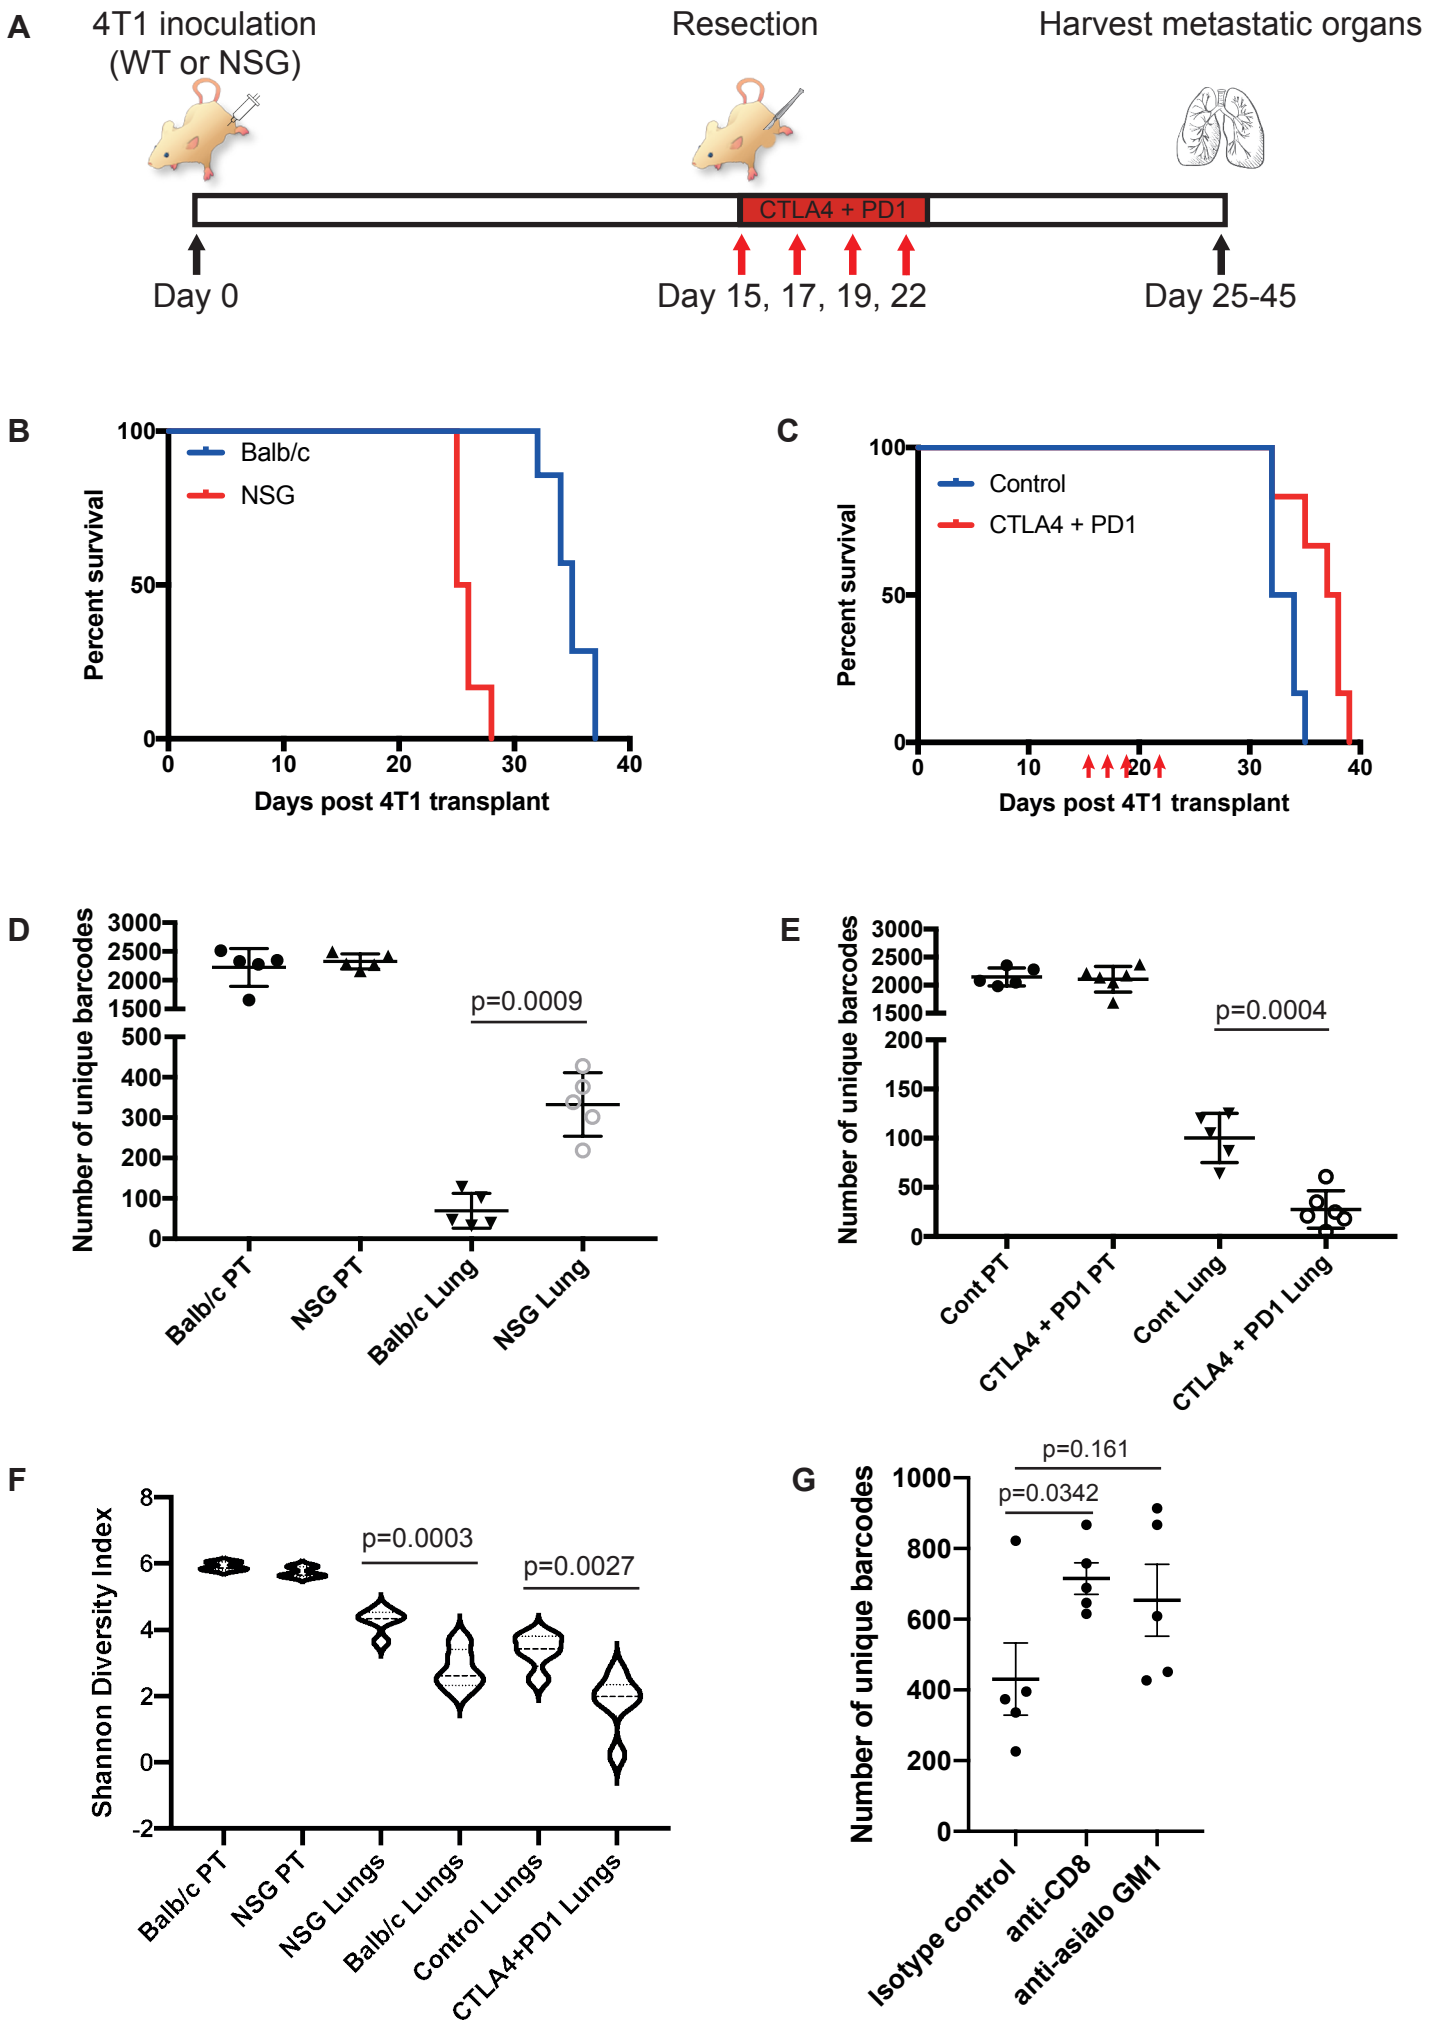

Figure 4

A

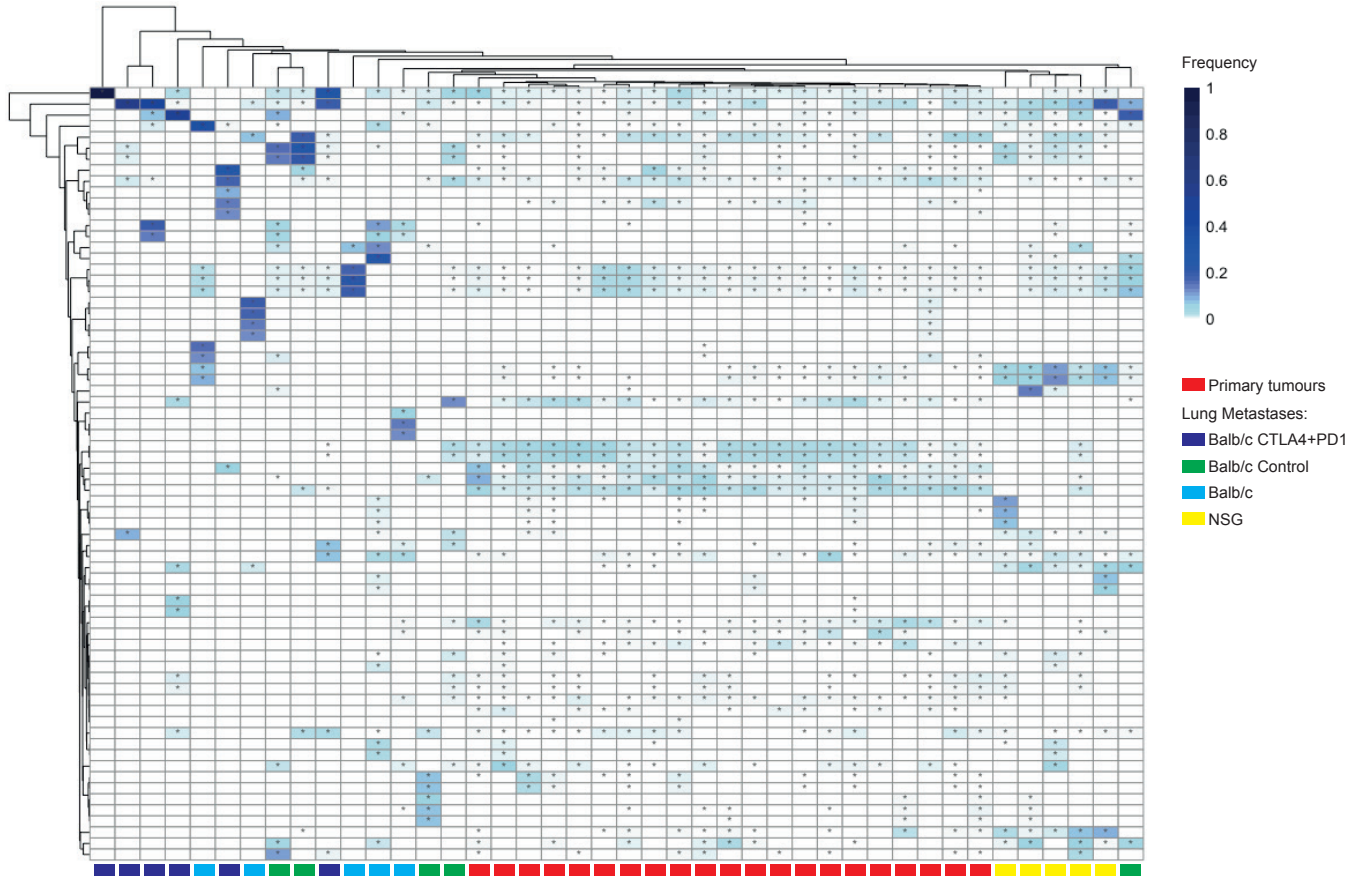

B

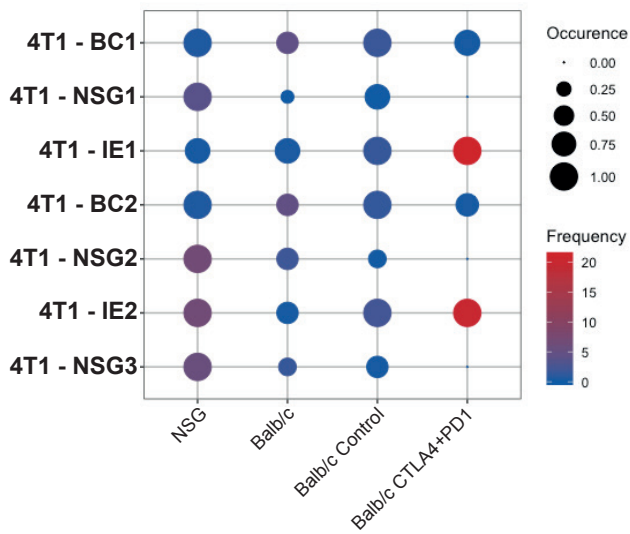

C

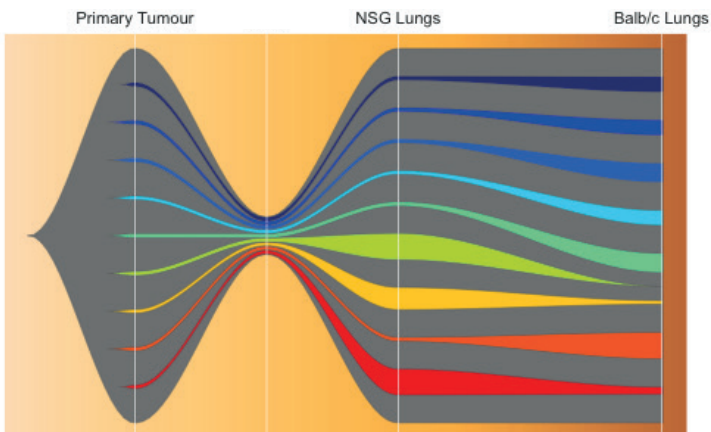

D

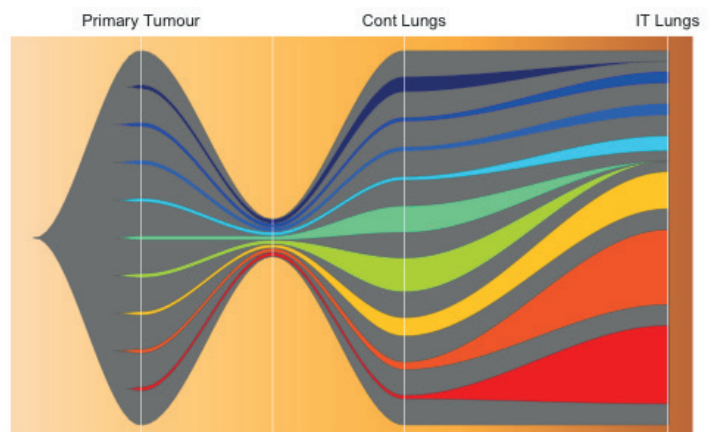

Figure 5

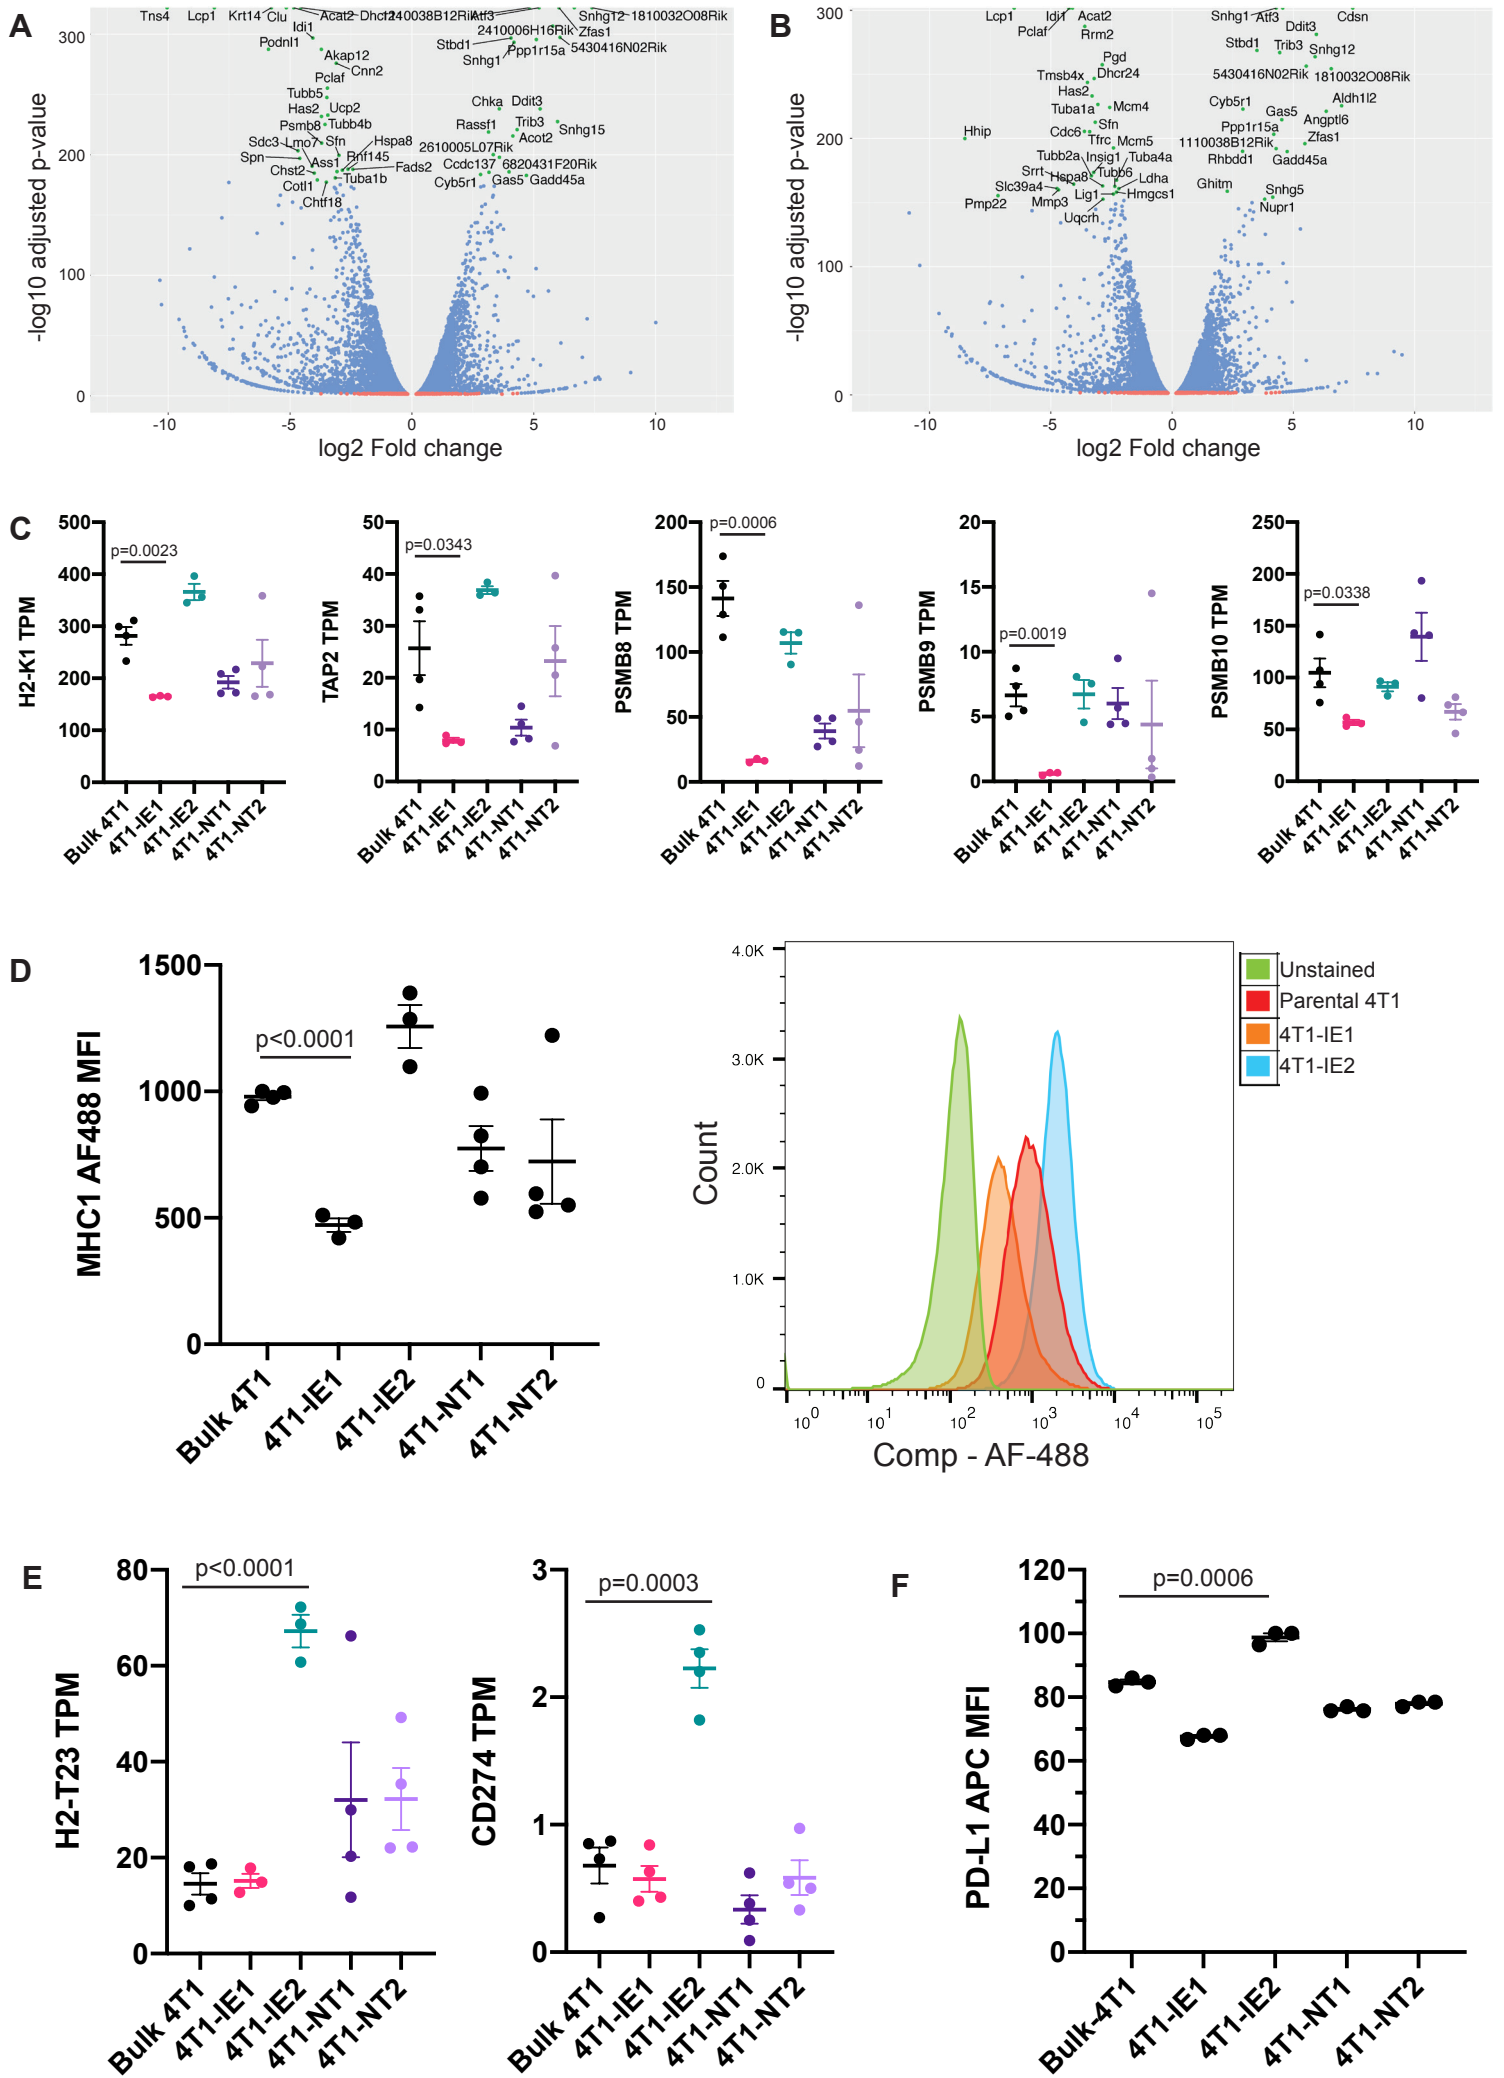



Figure 6

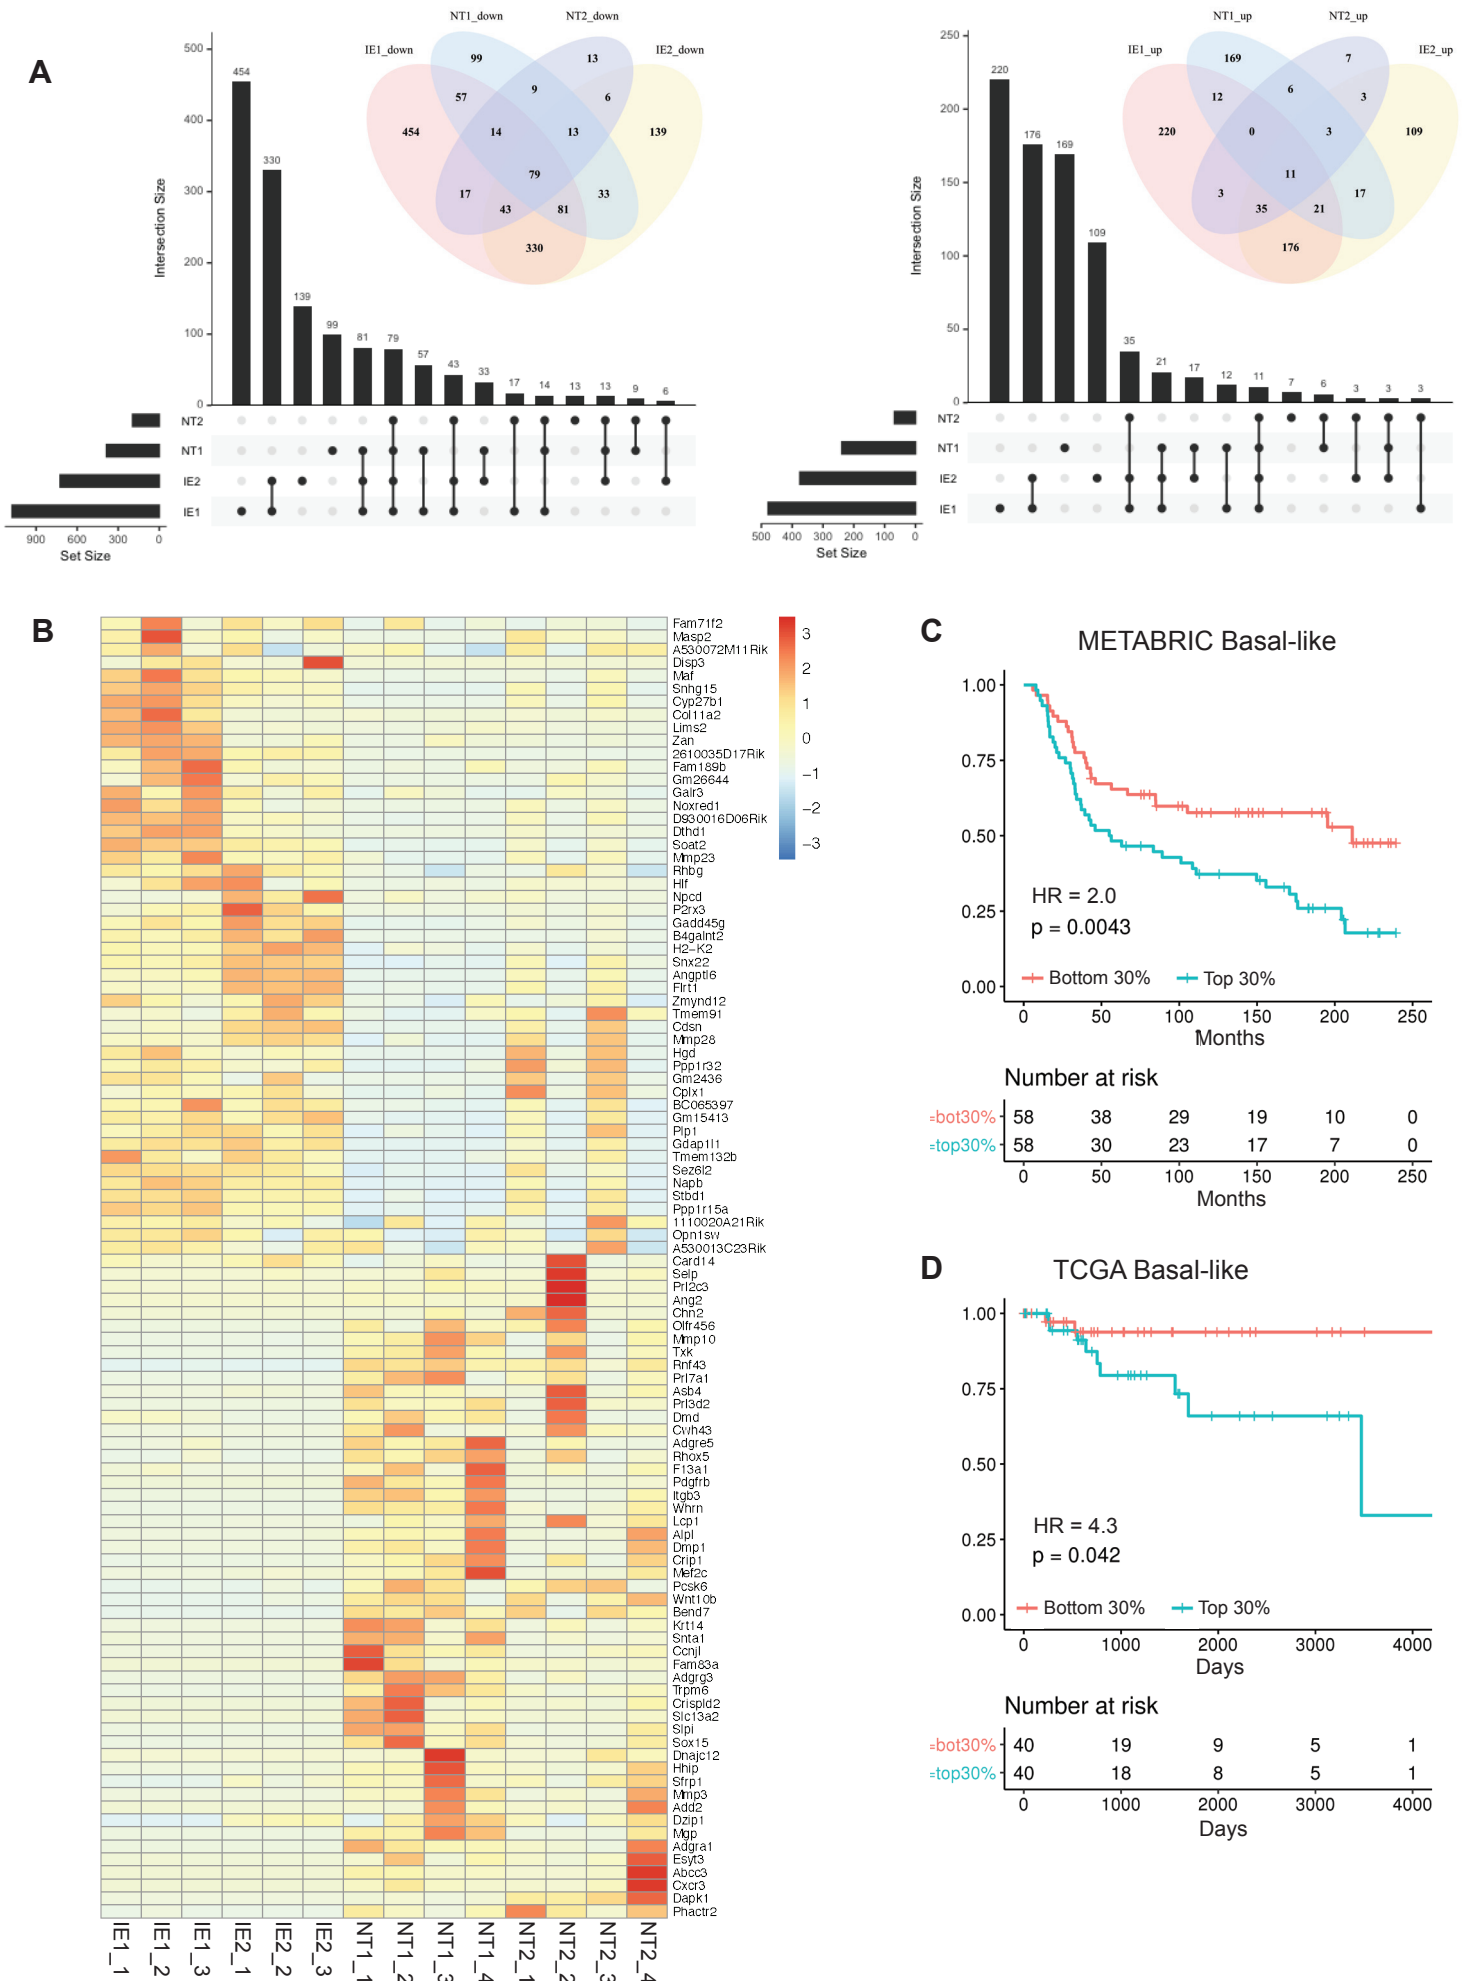

Sup Figure 1

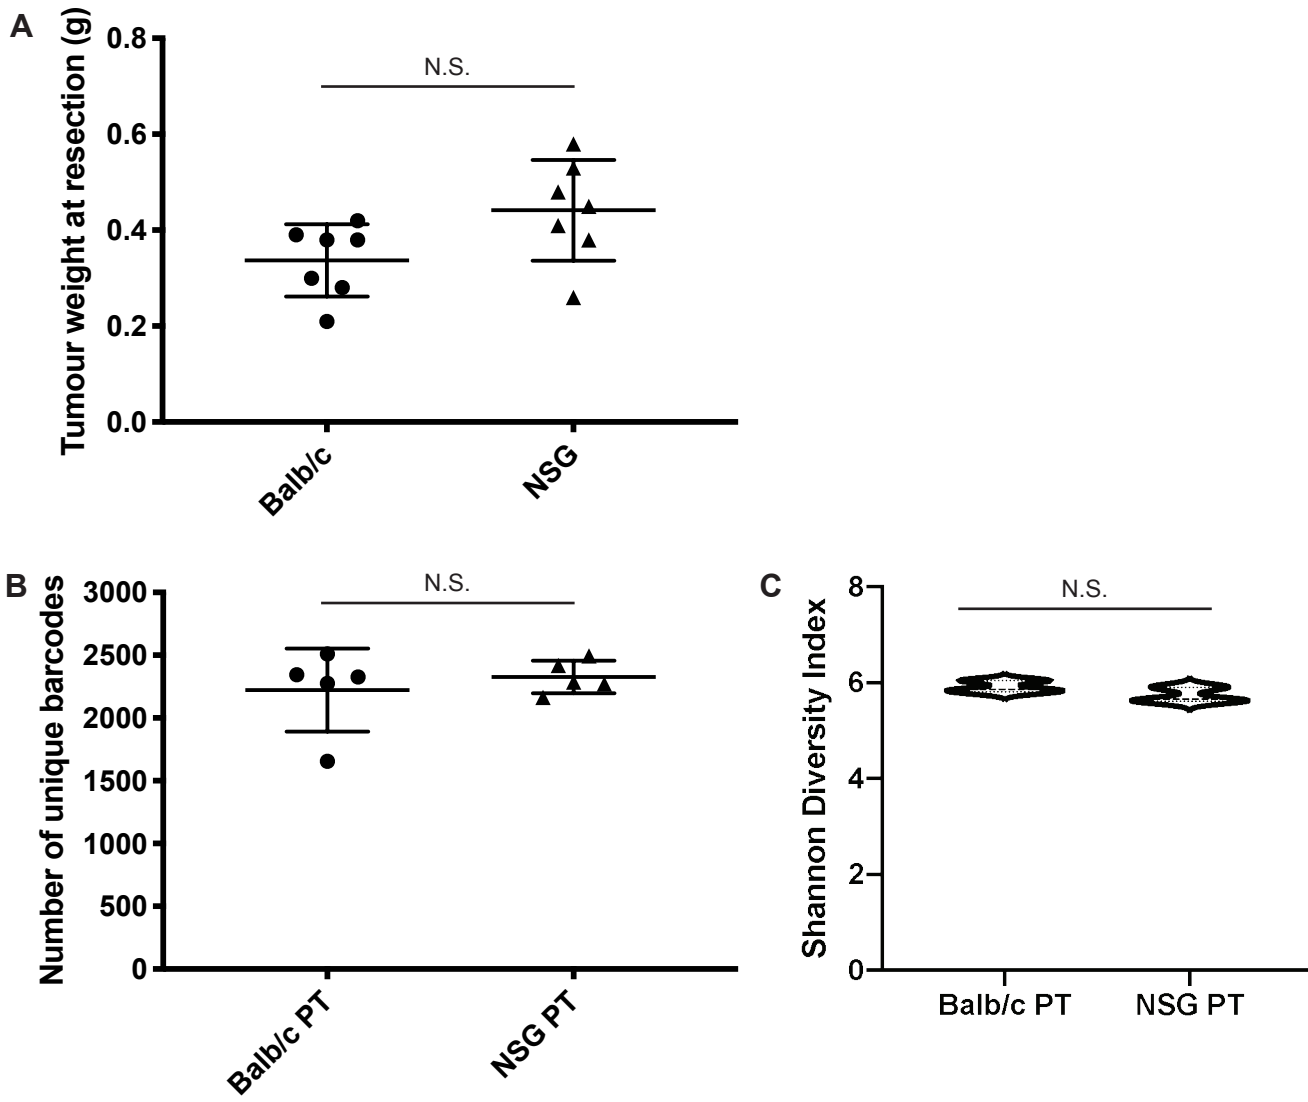

Sup Figure 3

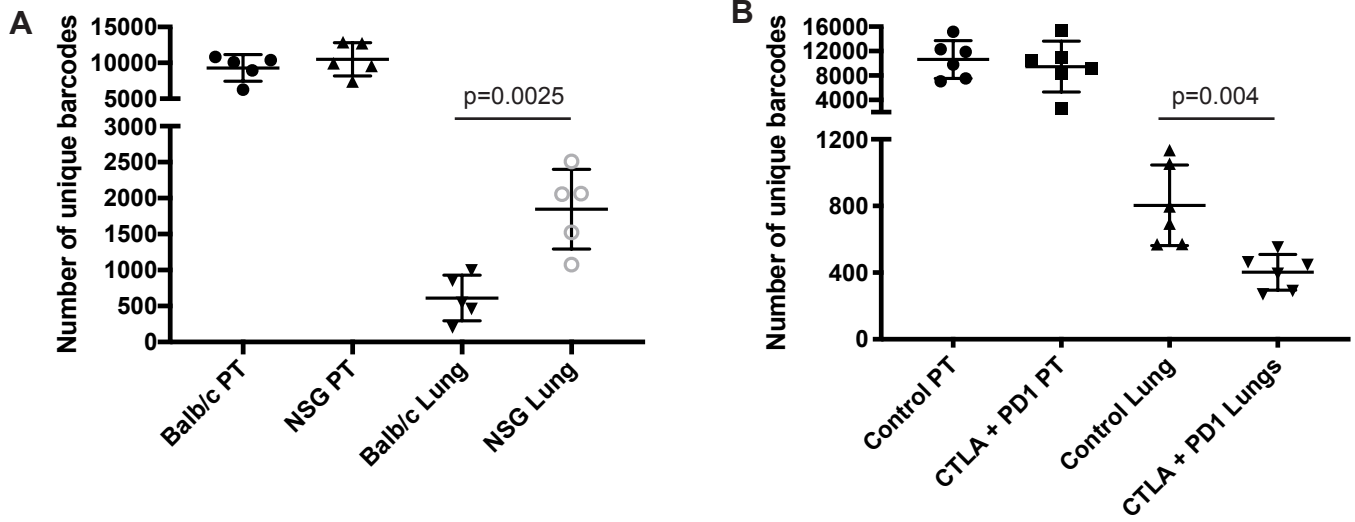

Sup Figure 4

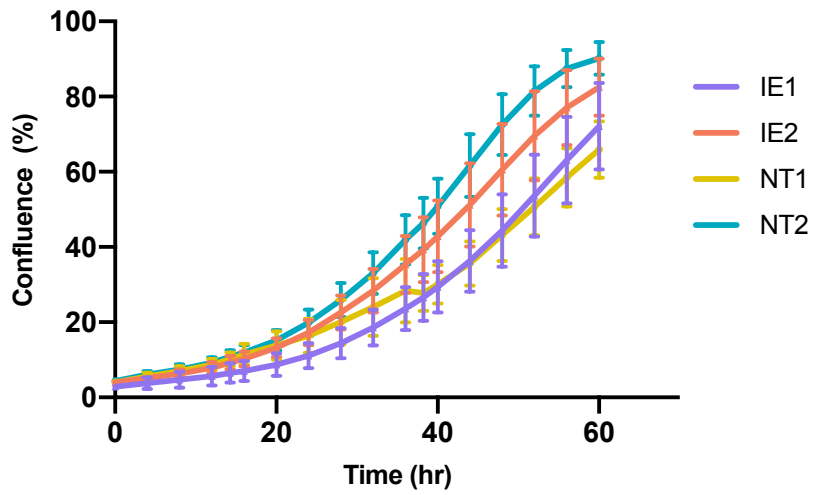



Sup Figure 5

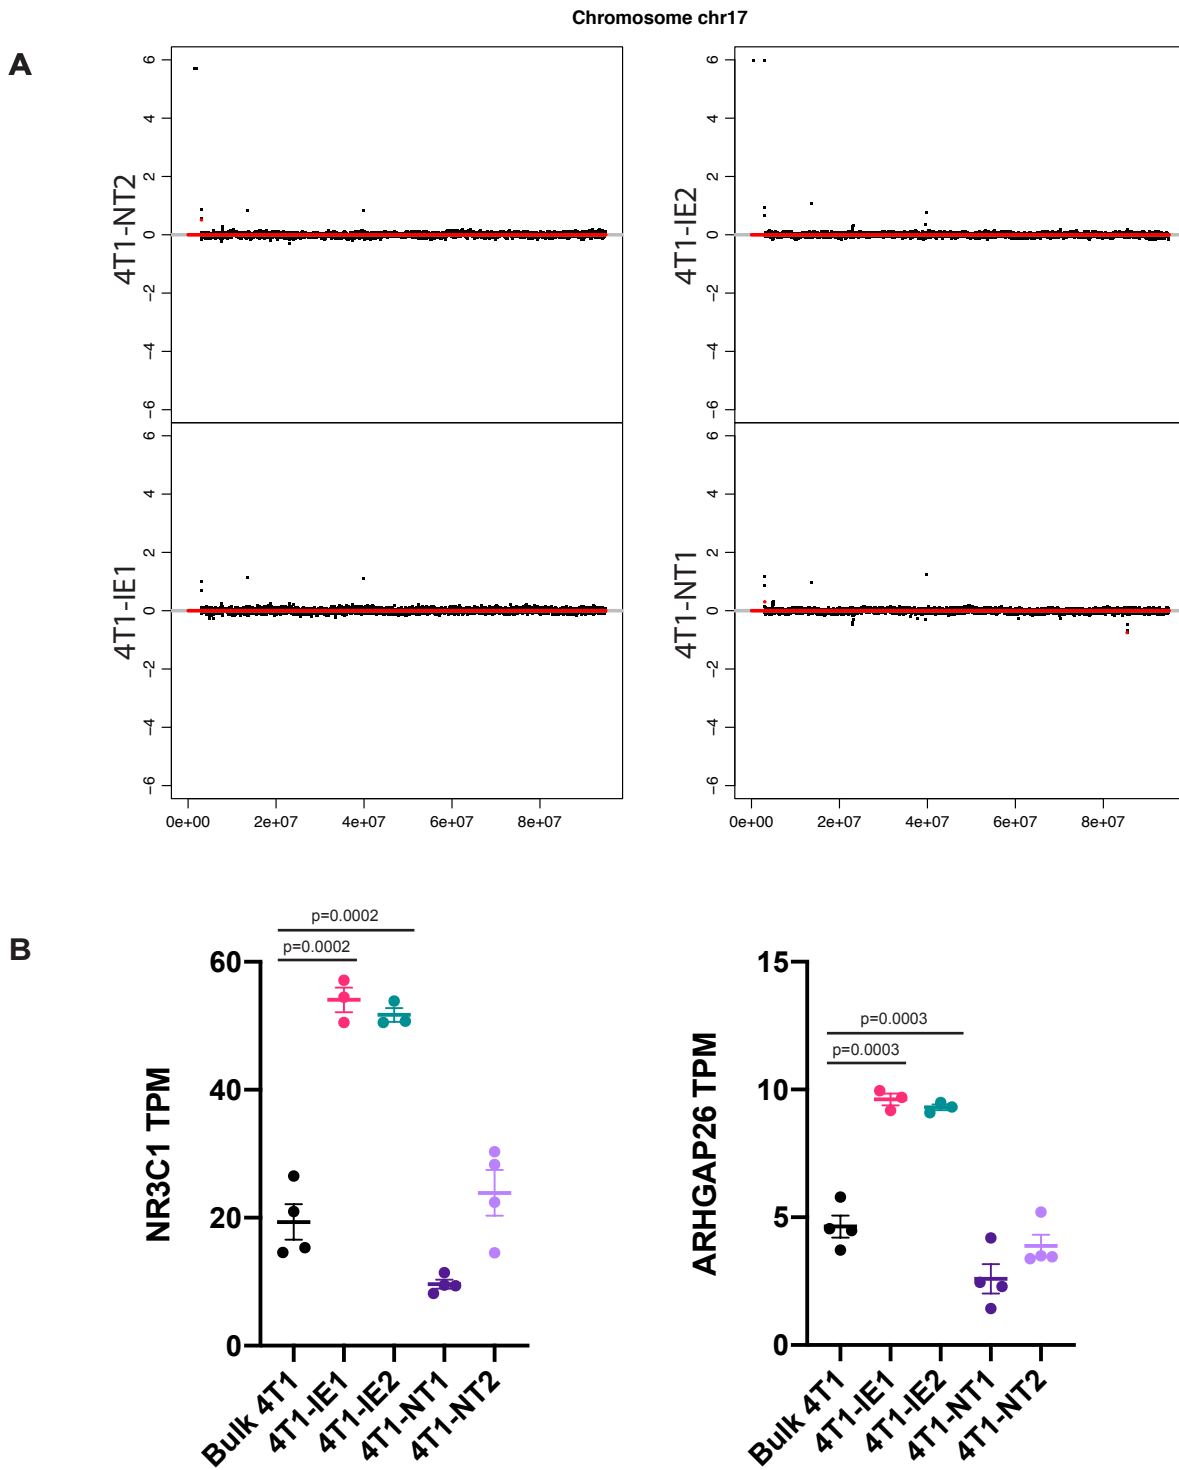

Sup Figure 6

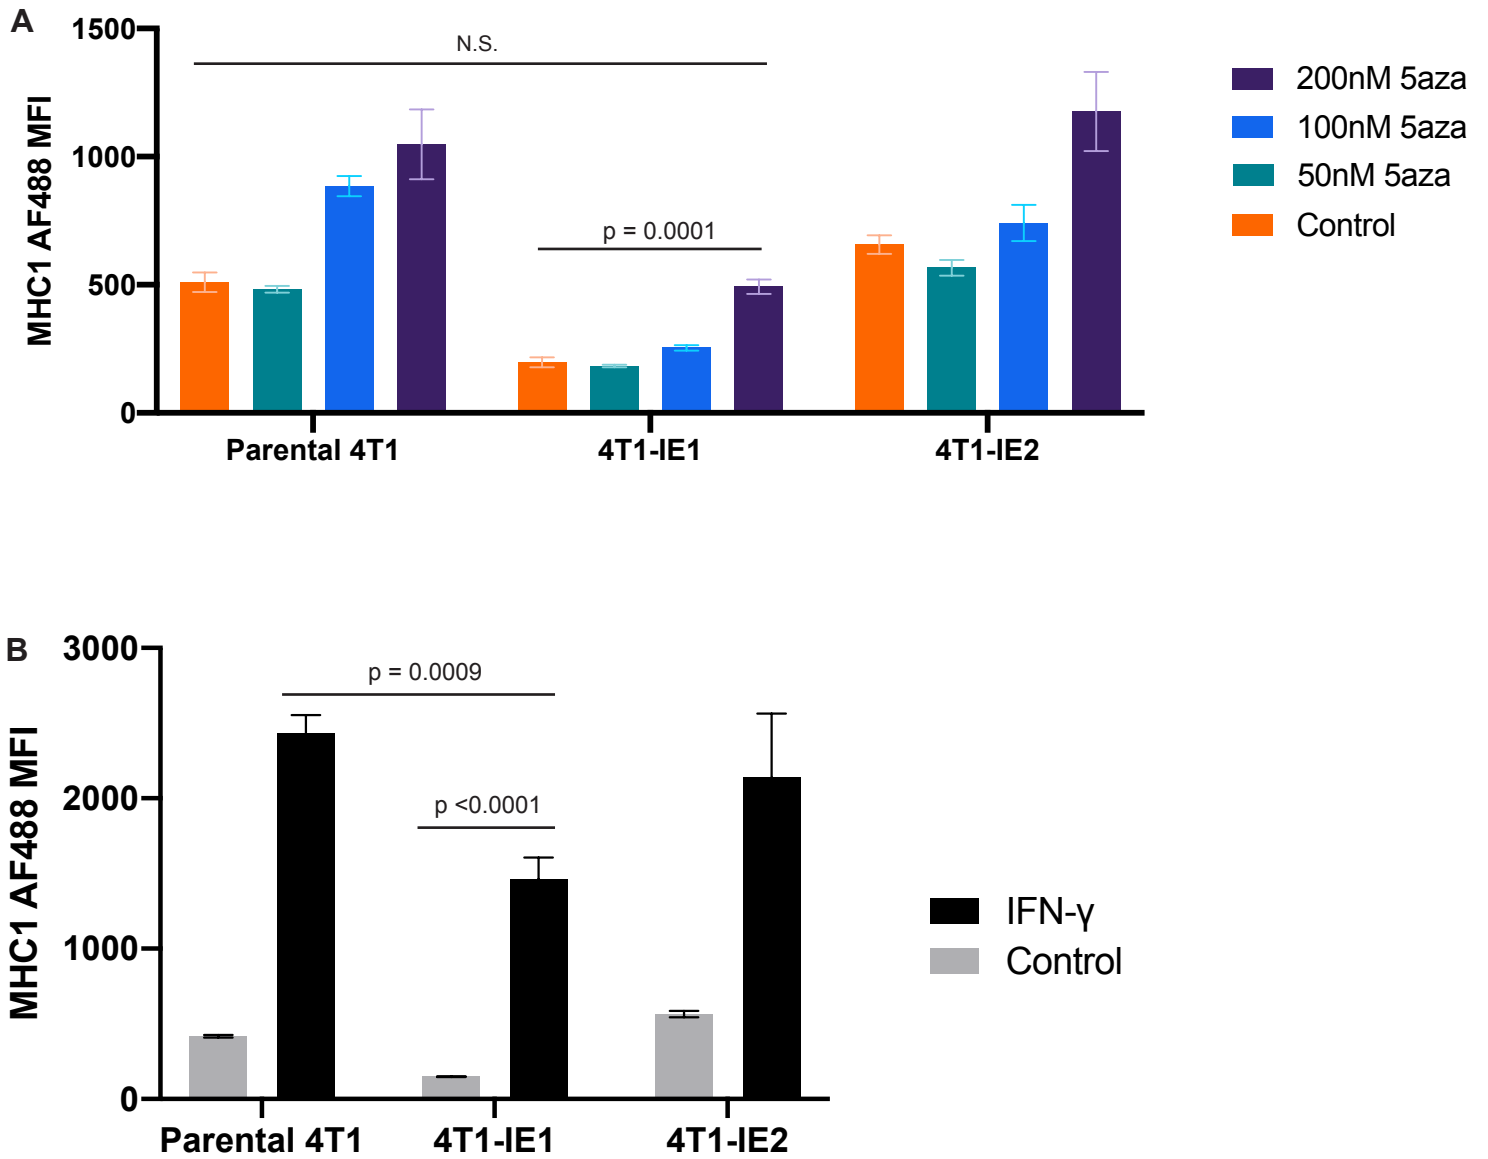

## Sup Figure 7

**A**

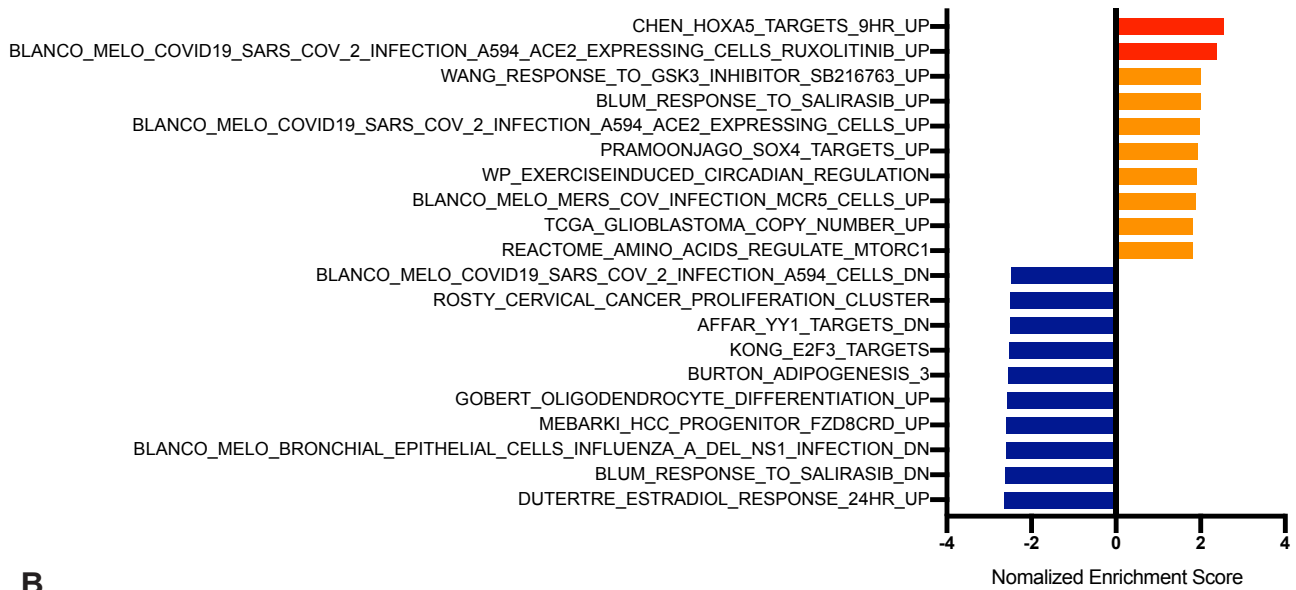

**B**

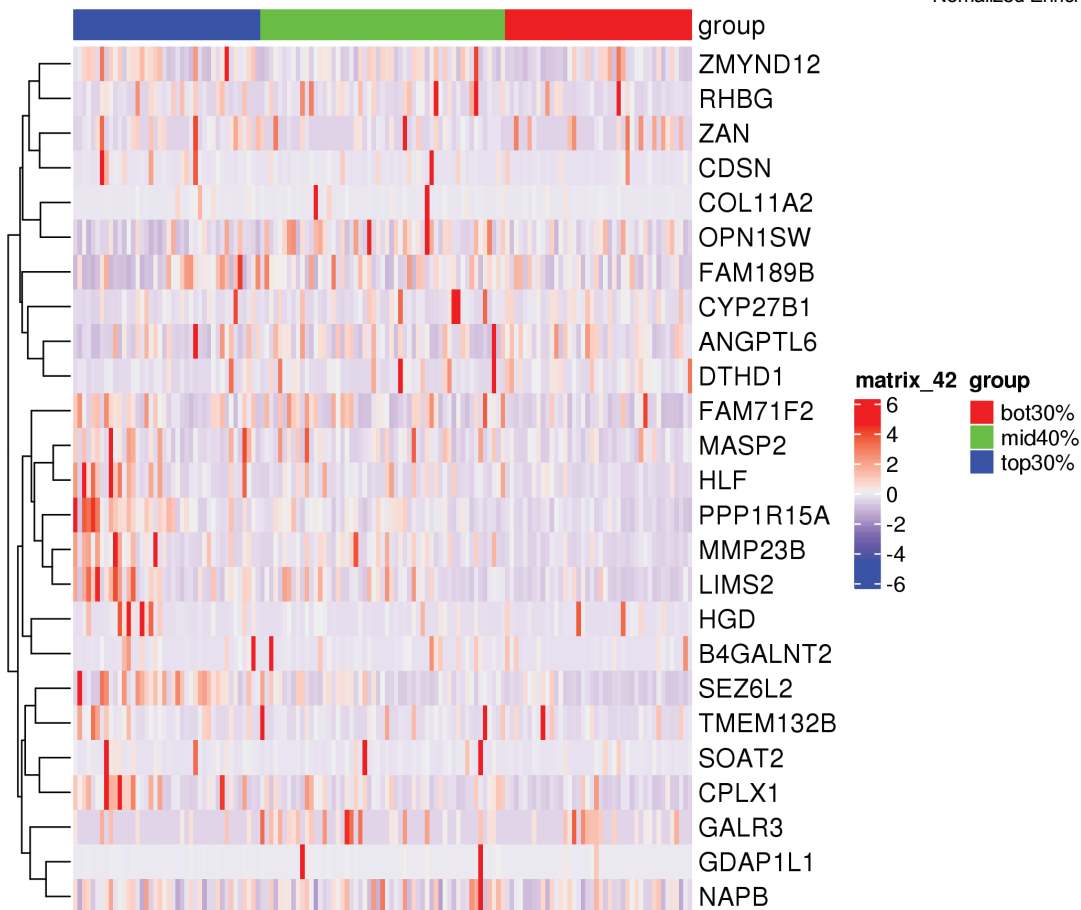

**C**

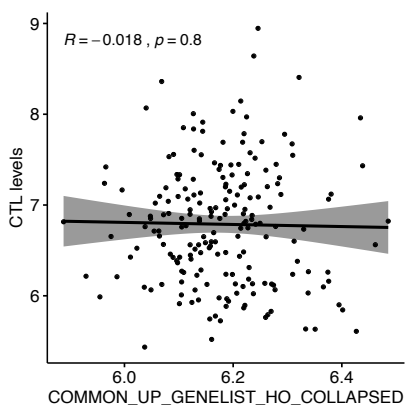

**D**

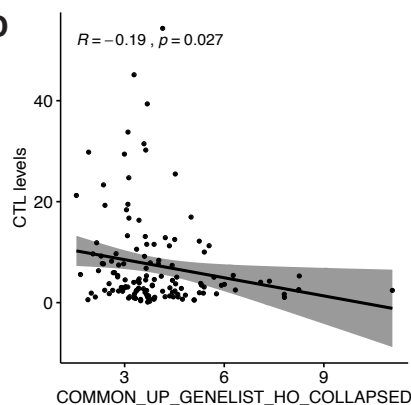

Source: https://www.biorxiv.org/content/biorxiv/early/2021/01/11/2021.01.11.426174.full.pdf
